# Supplementary material for: Glacial areas, lake areas, and snow lines from 1975 to 2012: status of the Cordillera Vilcanota, including the Quelccaya Ice Cap, northern central Andes, Peru
Source: Copernicus journal article supplement (doi:10.5194/tc-8-359-2014), 2014-03-03
Supplement: Supplementary file 1 [file tc-8-359-2014-supplement.pdf]

## **Supplementary Material**

### ***Glacial areas, lake areas, and snow lines from 1975 to 2012: Status of the Cordillera Vilcanota, including the Quelccaya Ice Cap, northern central Andes, Peru***

**M. N. Hanshaw<sup>1</sup> and B. Bookhagen<sup>1</sup>**

[1]{Department of Geography, University of California, Santa Barbara, U.S.A.}

#### **Supplement A: Imagery Used**

While lake extents can be outlined in any and all images (provided they are not occluded by clouds), glacierized regions, however, can only be outlined in images without local/regional snow (in addition to no cloud obstruction). As a result, this limits the number of images that can be used to create a glacial-area time series. Table S1 lists all the images used in this study, both for lakes (all images) and for glaciers (those mentioned). Specific thresholds for each image classification, in addition to which glacierized regions could be outlined in each image, are also mentioned. Note that images are dominantly from the cold dry season (May to September/October).

#### **Supplement B: Detailed Classification Processes**

The main manuscript describes the steps used to classify the lakes, glaciers, and the snowline. However, some additional information and clarifications on the processes are necessary and we provide them here.

**B1: Lake Classification**

While the Normalized Difference Water Index (NDWI) successfully classified the majority of the lakes in the Landsat TM/ETM+ images, the similar  $(AST3-AST1)/(AST3+AST1)$  algorithm used for the ASTER images (given that ASTER images do not contain a 'blue' band, 0.45-0.52  $\mu\text{m}$ ) required more information to satisfactorily classify lakes of different sediment loads in the ASTER imagery. The ASTER NDWI version performed reasonably to classify the higher sediment loaded lakes, contrary to the other imagery used. For lakes with lower sediment concentrations, however, an additional threshold was applied to ASTER band 3 ( $DN \leq 1000$ ) to include the remaining lakes. Often in the ASTER imagery, only the larger lower sediment-laden lakes were present in the images used, and so only the ASTER B3 threshold was necessary. However, in these cases we still used the ASTER NDWI algorithm for consistency.

While glacier images required processing in chronological order, classification and identification of the lake outlines in the imagery did not. Due to the fact that the lake classification and hillshade shadow removal steps alone could not remove all the incorrectly classified polygons in the images, manual editing to remove these was required. Taking the time to get the first image accurately classified for the lakes eases this process for all subsequent images. Images with the least amount of incorrectly classified "shadow" pixels are those with high solar azimuth and elevation angles, and so using one of these we removed all polygons within 1 pixel of the hillshade shadow mask. This removes any lakes that may have their outlines obscured by shadows producing an incorrect outline. In some cases, these outlines can be visible in the imagery, and therefore can still be included and just manually altered to the "correct" outline. After this step, we validated the classification visually for any additional incorrect polygons, removing them if necessary. This first image classification then created the first lake outline dataset in a master lake file. To ease this somewhat manually intensive incorrectly-classified-polygons process, the master lake file is then used with subsequent images to extract only those lake polygons whose centroids fall within the polygons in this master lake file. After each additional image had been classified, the lake dataset for each additional image was also appended into the master lake file to be used for each subsequent image (as not every lake is classified in each image). This step aids in ensuring that at each step the most lakes possible are incorporated in each lake mask and used to clip the glacier masks most effectively.

Upon selection and identification of the 50 lakes in the first lake file, a similar process to the above was also applied; instead of manually selecting and keeping only the 50 selected lakes, a master 'selected' lake file was used to always extract the selected lakes in each image so that they could be easily assigned with ID numbers and manually quality controlled. The lake classification process is summarized visually in Figure S1 (a), (b) and (c).

## **B2: Glacier Classification**

As mentioned in the manuscript, for our glacier classifications we followed the methodology outlined in Svoboda and Paul (2009). For the Landsat TM/ETM+ imagery, however, we added an additional 5x5 closing filter after their suggested 3x3 median filter. Initially, this additional filtering step appeared to work best with our imagery, however, pursuing this methodology on more imagery, the median filter alone appeared substantial enough. To maintain method consistency, we continued to apply the second filtering step to the remaining Landsat TM/ETM+ images.

One of the major assumptions we have made in this study is that the earliest image has the largest glacial extent, hence the use of processing glacier images in chronological order from earliest to latest. Having processed all 158 images over the 37 year time period of this study, we can say that this is correct at multi-annual timesteps. As each subsequent image is processed, the glacier polygon centroids for the current image are kept provided they fall within those polygons of the earlier images, each which has been continuously appended into a master glacier file upon completion of processing. Upon manual quality controlling of each image, if the location of a current image centroid was outside of the polygons of the previous years, yet the new ice patch (or old, depending on shape of the current polygon) was obviously a previous or new addition belonging to that glacierized region, these polygons were added to the glacierized polygons for that image, always being assigned the appropriate ID number. Upon completion of the classification for each image, each glacier dataset was appended into the master glacier file so that each subsequent image would always be using the master glacier dataset to ensure inclusion of all the glacierized areas of previous images. The glacier classification process is summarized visually in Figure S1 (d), (e) and (f).

## **B3: Snowline Classification**

For the snowline classification, we used endmember Regions Of Interest (ROI) and the software ENVI add-on package "VIPER Tools" (Roberts et al., 2007) to create a spectral library of the ROIs for each image. These spectral libraries of ROIs for each image were then merged and analyzed to identify the optimum spectra for each endmember following the directions given in the VIPER Tools Manual (Roberts et al., 2007). The Multiple Endmember Spectral Mixture Analysis (MESMA) was then run using only the optimal spectra for each endmember (Figure S2).

## **Supplement C: Additional Results**

### **C1: Glacier Area Changes**

The following figures (Figure S3 through Figure S11) are the same as Figure 9 and Figure 10 of the main manuscript, but for the remaining glacierized areas throughout the Cordillera Vilcanota (CV) and just beyond. Note that each figure has a different y-axis, although the x-axis for all are the same. The locations and extents of each of these glacierized areas can be found in Figure 8 of the manuscript. Table S2 presents the non-normalized version of the decline rates shown in Table 3 of the manuscript. Figure S12 illustrates the intra-annual variability that even occurs when classifying multiple visually snow-free images per year. Additional glacier analyses are presented in Figure S13 (normalized decline rates against median aspect of glaciers within individual watersheds) and Figure S14 (normalized decline rates against hypsometric integral within individual glacier watersheds).

### **C2: Lake Area Changes**

As mentioned in the manuscript, many lake areas do not change beyond their measurement uncertainties, whether they are large lakes or small lakes. We provide examples of such lake-area time series in Figure S15 (Figure S15a: Laguna Langui (Lake ID: 1), Figure S15b: Laguna Sibinacocha (Lake ID: 2), and Figure S15c: unnamed (Lake ID: 42)) so that this is more understandable (locations for all of these lakes are given in Figure 8). In Figure S16 we present the visual and graphical time series of a lake not connected to glacial watersheds which has been moderately declining (Laguna Jancocota (Lake ID: 11)).

Additional analyses indicating the lake-area changes within 5-year time intervals for lakes connected and not connected to glacial watersheds are also presented in Figure S17 (Figure S17a and Figure S17b, respectively). Table S3 presents the data used to create Figure 16.

### **C3: Snowlines**

Visual outlines of the MESMA classified snowlines for 1988, 1998, and 2009 are presented in Figure S18.

### **References for Supplementary Material**

- Roberts, D., Halligan, K. and Dennison, P.: VIPER Tools User Manual, UC Santa Barbara, Department of Geography, Version 1.7, 1–91, 2007.
- Svoboda, F. and Paul, F.: A new glacier inventory on southern Baffin Island, Canada, from ASTER data: I. Applied methods, challenges and solutions, *Annals of Glaciology*, 50(53), 11–21, 2009.

**Table S1:** All imagery used in this study in a chronological list. All classification methods and thresholds used on each image are indicated, in addition to which images could be used (and were) for the area measurements of each glacierized region. NDWI is the Normalized Difference Water Index, and DS stands for Density Slice.

| IMAGE INFORMATION |             |                       | LAKES                   | GLACIERS                |              |
|-------------------|-------------|-----------------------|-------------------------|-------------------------|--------------|
| Sensor            | Date        | Image ID              | Method & Threshold Used | Method & Threshold Used | Regions ID'd |
| Landsat 2 MSS     | 11-Jul-1975 | LM20020701975192AAA04 | B7-B4/B7+B4 < -0.25     |                         |              |
| Landsat 2 MSS     | 29-Jul-1975 | LM20020701975210AAA05 | B7-B4/B7+B4 < -0.25     | DS 105-255 (B6)         | -----6-8--   |
| Landsat 2 MSS     | 28-Oct-1975 | LM20030701975301AAA05 | B7-B4/B7+B4 < 0.00      | DS 150-255 (B6)         | -234--7-910  |
| Corona            | 3-Aug-1980  | DZB1216-500232L008001 | Manual                  | Manual                  | 1-----       |
| Landsat 4 MSS     | 13-Oct-1982 | LM40030701982286AAA03 | NDWI < -0.25            |                         |              |
| Landsat 5 TM      | 6-May-1985  | LT50030701985126AAA04 | NDWI < -0.55            | TM3/TM5 ≥ 2 & TM1 > 25  |              |
| Landsat 5 TM      | 25-Jul-1985 | LT50030701985206AAA08 | NDWI < -0.60            | TM3/TM5 ≥ 2 & TM1 > 25  |              |
| Landsat 5 MSS     | 10-Aug-1985 | LM50030701985222AAA03 | NDWI < 0.00             |                         |              |
| Landsat 5 MSS     | 26-Aug-1985 | LM50030701985238FFF03 | NDWI < 0.00             | DS 165-255 (B1)         | -----6--9-   |
| Landsat 5 TM      | 2-Aug-1988  | LT50030701988215CUB00 | NDWI < -0.55            | TM3/TM5 ≥ 2 & TM1 > 25  | 1234567-910  |
| Landsat 5 TM      | 18-Aug-1988 | LT50030701988231CUB00 | NDWI < -0.55            |                         |              |
| Landsat 5 TM      | 3-Sep-1988  | LT50030701988247CUB00 | NDWI < -0.50            | TM3/TM5 ≥ 2 & TM1 > 25  | 123456-8--   |
| Landsat 5 TM      | 5-Aug-1989  | LT50030701989217CUB00 | NDWI < -0.55            |                         |              |
| Landsat 5 TM      | 6-Sep-1989  | LT50030701989249CUB00 | NDWI < -0.50            |                         |              |
| Landsat 5 TM      | 22-Sep-1989 | LT50030701989265CUB00 | NDWI < -0.50            |                         |              |
| Landsat 5 TM      | 18-Apr-1990 | LT50030701990108XXX02 | NDWI < -0.50            |                         |              |
| Landsat 5 TM      | 4-May-1990  | LT50030701990124CUB00 | NDWI < -0.60            | TM3/TM5 ≥ 2 & TM1 > 25  | -----7-9-    |
| Landsat 5 TM      | 8-Aug-1990  | LT50030701990220CUB00 | NDWI < -0.55            |                         |              |
| Landsat 5 TM      | 4-Mar-1991  | LT50030701991063CUB00 | NDWI < -0.50            |                         |              |
| Landsat 5 TM      | 24-Jun-1991 | LT50030701991175XXX02 | NDWI < -0.60            |                         |              |
| Landsat 5 TM      | 10-Jul-1991 | LT50030701991191XXX01 | NDWI < -0.55            |                         |              |
| Landsat 5 TM      | 27-Aug-1991 | LT50030701991239XXX01 | NDWI < -0.45            | TM3/TM5 ≥ 2 & TM1 > 25  | -----910     |
| Landsat 5 TM      | 14-Oct-1991 | LT50030701991287AAA02 | NDWI < -0.50            |                         |              |
| Landsat 5 TM      | 17-Dec-1991 | LT50030701991351XXX02 | NDWI < -0.45            |                         |              |
| Landsat 5 TM      | 10-Jun-1992 | LT50030701992162CUB00 | NDWI < -0.40            | TM3/TM5 ≥ 2 & TM1 > 25  | 1-34567-910  |
| Landsat 5 TM      | 14-Sep-1992 | LT50030701992258CUB00 | NDWI < -0.40            | TM3/TM5 ≥ 2 & TM1 > 25  | 1---5-----   |
| Landsat 5 TM      | 12-May-1993 | LT50030701993132CUB00 | NDWI < -0.50            |                         |              |
| Landsat 5 TM      | 29-Jun-1993 | LT50030701993180CUB00 | NDWI < -0.50            | TM3/TM5 ≥ 2 & TM1 > 25  | -2---6----   |
| Landsat 5 TM      | 18-Jul-1994 | LT50030701994199CUB00 | NDWI < -0.50            | TM3/TM5 ≥ 2 & TM1 > 25  | -2---6-8--   |
| Landsat 5 TM      | 22-Aug-1995 | LT50030701995234CUB00 | NDWI < -0.50            | TM3/TM5 ≥ 2 & TM1 > 25  | 12345678910  |
| Landsat 5 TM      | 7-Sep-1995  | LT50030701995250CUB00 | NDWI < -0.50            | TM3/TM5 ≥ 2 & TM1 > 25  | 12345678910  |
| Landsat 5 TM      | 9-Oct-1995  | LT50030701995282CUB00 | NDWI < -0.40            | TM3/TM5 ≥ 2 & TM1 > 25  | 1-345-78910  |
| Landsat 5 TM      | 21-Jun-1996 | LT50030701996173XXX01 | NDWI < -0.60            | TM3/TM5 ≥ 2 & TM1 > 25  | -----6-89-   |
| Landsat 5 TM      | 23-Jul-1996 | LT50030701996205XXX00 | NDWI < -0.60            | TM3/TM5 ≥ 2 & TM1 > 25  | -2---6789-   |
| Landsat 5 TM      | 8-Aug-1996  | LT50030701996221XXX02 | NDWI < -0.55            |                         |              |
| Landsat 5 TM      | 24-Aug-1996 | LT50030701996237XXX03 | NDWI < -0.60            |                         |              |
| Landsat 5 TM      | 9-Sep-1996  | LT50030701996253XXX02 | NDWI < -0.55            |                         |              |
| Landsat 5 TM      | 27-Oct-1996 | LT50030701996301XXX01 | NDWI < -0.50            |                         |              |
| Landsat 5 TM      | 8-Jun-1997  | LT50030701997159XXX01 | NDWI < -0.55            |                         |              |
| Landsat 5 TM      | 24-Jun-1997 | LT50030701997175XXX02 | NDWI < -0.55            | TM3/TM5 ≥ 2 & TM1 > 25  | -----67---   |
| Landsat 5 TM      | 10-Jul-1997 | LT50030701997191CUB00 | NDWI < -0.55            | TM3/TM5 ≥ 2 & TM1 > 25  | -----678--   |
| Landsat 5 TM      | 26-Jul-1997 | LT50030701997207XXX01 | NDWI < -0.55            |                         |              |
| Landsat 5 TM      | 27-Aug-1997 | LT50030701997239AAA02 | NDWI < -0.55            | TM3/TM5 ≥ 2 & TM1 > 25  | -----6-8--   |
| Landsat 5 TM      | 10-May-1998 | LT50030701998130XXX01 | NDWI < -0.55            | TM3/TM5 ≥ 2 & TM1 > 25  | 12345678910  |
| Landsat 5 TM      | 26-May-1998 | LT50030701998146XXX01 | NDWI < -0.55            | TM3/TM5 ≥ 2 & TM1 > 25  | 12345678910  |
| Landsat 5 TM      | 13-Jul-1998 | LT50030701998194XXX01 | NDWI < -0.55            |                         |              |
| Landsat 5 TM      | 29-Jul-1998 | LT50030701998210XXX00 | NDWI < -0.55            | TM3/TM5 ≥ 2 & TM1 > 25  | 12345678910  |
| Landsat 5 TM      | 14-Aug-1998 | LT50030701998226XXX01 | NDWI < -0.45            |                         |              |

# Hanshaw and Bookhagen: Supplementary Material

| IMAGE INFORMATION   |             |                            | LAKES                     | GLACIERS                  |              |
|---------------------|-------------|----------------------------|---------------------------|---------------------------|--------------|
| Sensor              | Date        | Image ID                   | Method & Threshold Used   | Method & Threshold Used   | Regions ID'd |
| Landsat 5 TM        | 30-Aug-1998 | LT50030701998242XXX01      | NDWI < -0.55              | TM3/TM5 ≥ 2 & TM1 > 25    | 1-----       |
| Landsat 5 TM        | 15-Sep-1998 | LT50030701998258XXX02      | NDWI < -0.55              | TM3/TM5 ≥ 2 & TM1 > 25    | 1----5----   |
| Landsat 5 TM        | 27-Apr-1999 | LT50030701999117CUB00      | NDWI < -0.40              |                           |              |
| Landsat 5 TM        | 29-May-1999 | LT50030701999149XXX01      | NDWI < -0.50              |                           |              |
| Landsat 5 TM        | 14-Jun-1999 | LT50030701999165XXX01      | NDWI < -0.55              |                           |              |
| Landsat 5 TM        | 30-Jun-1999 | LT50030701999181XXX02      | NDWI < -0.50              |                           |              |
| Landsat 7 (SLC-on)  | 9-Aug-1999  | LE70030701999221EDC01      | NDWI < -0.40              |                           |              |
| Landsat 5 TM        | 5-Nov-1999  | LT50030701999309CPE01      | NDWI < -0.45              |                           |              |
| Landsat 5 TM        | 21-Nov-1999 | LT50030701999325CPE01      | NDWI < -0.45              | TM3/TM5 ≥ 2 & TM1 > 25    | 1--4567-9-   |
| Landsat 5 TM        | 15-May-2000 | LT50030702000136XXX02      | NDWI < -0.55              |                           |              |
| Landsat 7 (SLC-on)  | 23-May-2000 | LE70030702000144EDC00      | NDWI < -0.50              |                           |              |
| Landsat 5 TM        | 31-May-2000 | LT50030702000152XXX02      | NDWI < -0.50              |                           |              |
| Landsat 5 TM        | 16-Jun-2000 | LT50030702000168XXX02      | NDWI < -0.55              |                           |              |
| Landsat 7 (SLC-on)  | 24-Jun-2000 | LE70030702000176EDC00      | NDWI < -0.40              |                           |              |
| Landsat 5 TM        | 2-Jul-2000  | LT50030702000184XXX02      | NDWI < -0.50              |                           |              |
| Landsat 5 TM        | 18-Jul-2000 | LT50030702000200XXX02      | NDWI < -0.40              | TM3/TM5 ≥ 2 & TM1 > 25    | ---4-67-9-   |
| Landsat 5 TM        | 4-Sep-2000  | LT50030702000248XXX02      | NDWI < -0.35              |                           |              |
| Landsat 7 (SLC-on)  | 12-Sep-2000 | LE70030702000256EDC00      | NDWI < -0.30              | ETM3/ETM5 ≥ 2 & ETM1 > 25 | -----6----   |
| Landsat 5 TM        | 19-Jun-2001 | LT50030702001170CUB00      | NDWI < -0.40              |                           |              |
| ASTER-L1A (w/ SWIR) | 13-Jul-2001 | AST_L1A_003_07132001151224 | NDWI < -0.20 OR B3 ≤ 1000 |                           |              |
| Landsat 5 TM        | 21-Jul-2001 | LT50030702001202CUB00      | NDWI < -0.50              |                           |              |
| Landsat 7 (SLC-on)  | 14-Aug-2001 | LE70030702001226EDC00      | NDWI < -0.40              |                           |              |
| Landsat 7 (SLC-on)  | 4-Oct-2002  | LE70030702002277EDC00      | NDWI < -0.30              |                           |              |
| ASTER-L1A (w/ SWIR) | 4-Oct-2002  | AST_L1A_003_10042002150525 | NDWI < -0.15 OR B3 ≤ 1000 |                           |              |
| ASTER-L1A (w/ SWIR) | 30-Apr-2003 | AST_L1A_003_04302003150425 | NDWI < -0.25 OR B3 ≤ 1000 |                           |              |
| Landsat 7 (SLC-on)  | 30-Apr-2003 | LE70030702003120EDC00      | NDWI < -0.40              |                           |              |
| ASTER-L1A (w/ SWIR) | 8-Jun-2003  | AST_L1A_003_06082003151047 | NDWI < -0.25 OR B3 ≤ 1000 |                           |              |
| ASTER-L1A (w/ SWIR) | 20-Aug-2003 | AST_L1A_003_08202003150335 | NDWI < -0.30 OR B3 ≤ 1000 |                           |              |
| Landsat 5 TM        | 29-Sep-2003 | LT50030702003272CUB00      | NDWI < -0.40              | TM3/TM5 ≥ 2 & TM1 > 25    | 1-----7---   |
| Landsat 5 TM        | 15-Oct-2003 | LT50030702003288CUB00      | NDWI < -0.50              | TM3/TM5 ≥ 2 & TM1 > 25    | 1--4--7-9-   |
| ASTER-L1A (w/ SWIR) | 8-Nov-2003  | AST_L1A_003_11082003150436 | NDWI < -0.20 OR B3 ≤ 1000 | B3/B4 ≥ 1.6 & B1 > 47     | ---4--7---   |
| Landsat 5 TM        | 8-Apr-2004  | LT50030702004099CUB00      | NDWI < -0.50              | TM3/TM5 ≥ 2 & TM1 > 25    | 1-----6----  |
| Landsat 5 TM        | 10-May-2004 | LT50030702004131CUB00      | NDWI < -0.55              |                           |              |
| ASTER-L1A (w/ SWIR) | 3-Jun-2004  | AST_L1A_003_06032004150417 | NDWI < -0.25 OR B3 ≤ 1000 | B3/B4 ≥ 1.6 & B1 > 47     | -----6----   |
| Landsat 5 TM        | 11-Jun-2004 | LT50030702004163CUB00      | NDWI < -0.60              | TM3/TM5 ≥ 2 & TM1 > 25    | 1-34--7---   |
| ASTER-L1A (w/ SWIR) | 21-Jul-2004 | AST_L1A_003_07212004150403 | NDWI < -0.25 OR B3 ≤ 1000 |                           |              |
| ASTER-L1A (w/ SWIR) | 6-Aug-2004  | AST_L1A_003_08062004150355 | NDWI < -0.25 OR B3 ≤ 1000 |                           |              |
| ASTER-L1A (w/ SWIR) | 6-Aug-2004  | AST_L1A_003_08062004150404 | NDWI < -0.25 OR B3 ≤ 1000 |                           |              |
| Landsat 5 TM        | 26-Mar-2005 | LT50030702005085CUB00      | NDWI < -0.45              |                           |              |
| Landsat 5 TM        | 11-Apr-2005 | LT50030702005101CUB00      | NDWI < -0.50              |                           |              |
| Landsat 5 TM        | 29-May-2005 | LT50030702005149CUB00      | NDWI < -0.55              | TM3/TM5 ≥ 2 & TM1 > 25    | 123456789-   |
| ASTER-L1A (w/ SWIR) | 13-Jun-2005 | AST_L1A_003_06132005150939 | NDWI < -0.20 OR B3 ≤ 1000 | B3/B4 ≥ 1.6 & B1 > 47     | ---4--7---   |
| Landsat 5 TM        | 14-Jun-2005 | LT50030702005165CUB00      | NDWI < -0.45              | TM3/TM5 ≥ 2 & TM1 > 25    | ---4-----    |
| Landsat 5 TM        | 30-Jun-2005 | LT50030702005181CUB00      | NDWI < -0.45              | TM3/TM5 ≥ 2 & TM1 > 25    | 12345-78910  |
| ASTER-L1A (w/ SWIR) | 8-Jul-2005  | AST_L1A_003_07082005150341 | NDWI < -0.25 OR B3 ≤ 1000 |                           |              |
| Landsat 5 TM        | 16-Jul-2005 | LT50030702005197CUB00      | NDWI < -0.50              | TM3/TM5 ≥ 2 & TM1 > 25    | 12345678910  |
| ASTER-L1A (w/ SWIR) | 24-Jul-2005 | AST_L1A_003_07242005150342 | NDWI < -0.25 OR B3 ≤ 1000 |                           |              |
| Landsat 5 TM        | 1-Aug-2005  | LT50030702005213CUB00      | NDWI < -0.45              | TM3/TM5 ≥ 2 & TM1 > 25    | 1--5-78--    |
| Landsat 5 TM        | 17-Aug-2005 | LT50030702005229CUB00      | NDWI < -0.45              | TM3/TM5 ≥ 2 & TM1 > 25    | 1--5678--    |
| Landsat 5 TM        | 16-May-2006 | LT50030702006136CUB00      | NDWI < -0.50              | TM3/TM5 ≥ 2 & TM1 > 25    | -----6----   |
| ASTER-L1A (w/ SWIR) | 24-May-2006 | AST_L1A_003_05242006150336 | NDWI < -0.25 OR B3 ≤ 1000 | B3/B4 ≥ 1.6 & B1 > 47     | -----6----   |
| Landsat 5 TM        | 17-Jun-2006 | LT50030702006168CUB00      | NDWI < -0.55              | TM3/TM5 ≥ 2 & TM1 > 25    | 1--56-89-    |
| ASTER-L1A (w/ SWIR) | 25-Jun-2006 | AST_L1A_003_06252006150357 | NDWI < -0.25 OR B3 ≤ 1000 |                           |              |
| Landsat 5 TM        | 19-Jul-2006 | LT50030702006200CUB00      | NDWI < -0.60              | TM3/TM5 ≥ 2 & TM1 > 25    | 12--56789-   |
| ASTER-L1A (w/ SWIR) | 27-Jul-2006 | AST_L1A_003_07272006150413 | NDWI < -0.25 OR B3 ≤ 1000 | B3/B4 ≥ 1.6 & B1 > 47     | -----910     |
| Landsat 5 TM        | 4-Aug-2006  | LT50030702006216CUB01      | NDWI < -0.50              |                           |              |
| ASTER-L1A (w/ SWIR) | 12-Aug-2006 | AST_L1A_003_08122006150403 | NDWI < -0.25 OR B3 ≤ 1000 |                           |              |
| Landsat 5 TM        | 5-Sep-2006  | LT50030702006248CUB00      | NDWI < -0.50              |                           |              |
| Landsat 5 TM        | 20-Jun-2007 | LT50030702007171CUB00      | NDWI < -0.50              | TM3/TM5 ≥ 2 & TM1 > 25    | 1234567---   |
| Landsat 5 TM        | 6-Jul-2007  | LT50030702007187CUB00      | NDWI < -0.45              | TM3/TM5 ≥ 2 & TM1 > 25    | 12345678910  |
| Landsat 5 TM        | 22-Jul-2007 | LT50030702007203CUB00      | NDWI < -0.55              |                           |              |
| Landsat 5 TM        | 7-Aug-2007  | LT50030702007219CUB00      | NDWI < -0.50              | TM3/TM5 ≥ 2 & TM1 > 25    | 123-567---   |
| Landsat 5 TM        | 23-Aug-2007 | LT50030702007235CUB00      | NDWI < -0.50              | TM3/TM5 ≥ 2 & TM1 > 25    | --345678--   |
| Landsat 5 TM        | 5-May-2008  | LT50030702008126CUB00      | NDWI < -0.50              |                           |              |
| Landsat 5 TM        | 21-May-2008 | LT50030702008142CUB00      | NDWI < -0.50              |                           |              |
| Landsat 5 TM        | 6-Jun-2008  | LT50030702008158CUB00      | NDWI < -0.55              | TM3/TM5 ≥ 2 & TM1 > 25    | -----9-      |
| Landsat 5 TM        | 24-Jul-2008 | LT50030702008206CUB00      | NDWI < -0.50              | TM3/TM5 ≥ 2 & TM1 > 25    | 1-----7-910  |

# Hanshaw and Bookhagen: Supplementary Material

| IMAGE INFORMATION    |             |                            | LAKES                     | GLACIERS                |                       |
|----------------------|-------------|----------------------------|---------------------------|-------------------------|-----------------------|
| Sensor               | Date        | Image ID                   | Method & Threshold Used   | Method & Threshold Used | Regions ID'd          |
| ASTER-L1A (w/o SWIR) | 1-Aug-2008  | AST_L1A_003_08012008150435 | NDWI < -0.25 OR B3 ≤ 1000 | Manual                  | 1 - - - - 6 - - - -   |
| Landsat 5 TM         | 9-Aug-2008  | LT50030702008222CUB00      | NDWI < -0.50              |                         |                       |
| Landsat 5 TM         | 25-Aug-2008 | LT50030702008238CUB00      | NDWI < -0.55              | TM3/TM5 ≥ 2 & TM1 > 25  | 1 2 3 4 5 6 7 8 9 10  |
| Landsat 5 TM         | 26-Sep-2008 | LT50030702008270CUB00      | NDWI < -0.50              | TM3/TM5 ≥ 2 & TM1 > 25  | 1 - - - - 7 - - -     |
| Landsat 5 TM         | 12-Oct-2008 | LT50030702008286CUB00      | NDWI < -0.50              | TM3/TM5 ≥ 2 & TM1 > 25  | 1 - - - 5 - - - - -   |
| Landsat 5 TM         | 8-May-2009  | LT50030702009128CUB00      | NDWI < -0.50              |                         |                       |
| Landsat 5 TM         | 24-May-2009 | LT50030702009144CUB00      | NDWI < -0.50              |                         |                       |
| Landsat 5 TM         | 9-Jun-2009  | LT50030702009160CUB00      | NDWI < -0.50              | TM3/TM5 ≥ 2 & TM1 > 25  | - - - - - 6 - - - -   |
| Landsat 5 TM         | 25-Jun-2009 | LT50030702009176CUB00      | NDWI < -0.50              | TM3/TM5 ≥ 2 & TM1 > 25  | 1 - - - 4 5 6 7 - - - |
| ASTER-L1A (w/o SWIR) | 3-Jul-2009  | AST_L1A_003_07032009150439 | NDWI < -0.25 OR B3 ≤ 1000 | Manual                  | 1 - - - 5 - 7 - - -   |
| Landsat 5 TM         | 11-Jul-2009 | LT50030702009192CUB00      | NDWI < -0.50              |                         |                       |
| ASTER-L1A (w/o SWIR) | 19-Jul-2009 | AST_L1A_003_07192009150435 | NDWI < -0.20 OR B3 ≤ 1000 | Manual                  | 1 - - - 5 - 7 - - -   |
| ASTER-L1A (w/o SWIR) | 4-Aug-2009  | AST_L1A_003_08042009150436 | NDWI < -0.25 OR B3 ≤ 1000 |                         |                       |
| ASTER-L1A (w/o SWIR) | 4-Aug-2009  | AST_L1A_003_08042009150445 | NDWI < -0.25 OR B3 ≤ 1000 |                         |                       |
| Landsat 5 TM         | 28-Aug-2009 | LT50030702009240CUB00      | NDWI < -0.50              | TM3/TM5 ≥ 2 & TM1 > 25  | 1 2 3 4 5 6 - 8 - 10  |
| Landsat 5 TM         | 13-Sep-2009 | LT50030702009256CUB00      | NDWI < -0.50              |                         |                       |
| Landsat 5 TM         | 15-Oct-2009 | LT50030702009288CUB00      | NDWI < -0.50              | TM3/TM5 ≥ 2 & TM1 > 25  | 1 - - - - 7 - 9 10    |
| Landsat 5 TM         | 31-Oct-2009 | LT50030702009304CUB00      | NDWI < -0.40              |                         |                       |
| ASTER-L1A (w/o SWIR) | 3-May-2010  | AST_L1A_003_05032010150415 | NDWI < -0.25 OR B3 ≤ 1000 | Manual                  | - - - 4 - - - - -     |
| ASTER-L1A (w/o SWIR) | 3-May-2010  | AST_L1A_003_05032010150423 | NDWI < -0.25 OR B3 ≤ 1000 |                         |                       |
| Landsat 5 TM         | 12-Jun-2010 | LT50030702010163CUB00      | NDWI < -0.45              | TM3/TM5 ≥ 2 & TM1 > 25  | 1 - - 4 5 6 - 8 9 10  |
| ASTER-L1A (w/o SWIR) | 6-Jul-2010  | AST_L1A_003_07062010150420 | NDWI < -0.20 OR B3 ≤ 1000 | Manual                  | 1 - - - - 6 - - - -   |
| ASTER-L1A (w/o SWIR) | 22-Jul-2010 | AST_L1A_003_07222010150413 | NDWI < -0.25 OR B3 ≤ 1000 |                         |                       |
| Landsat 5 TM         | 30-Jul-2010 | LT50030702010211CUB00      | NDWI < -0.55              |                         |                       |
| ASTER-L1A (w/o SWIR) | 7-Aug-2010  | AST_L1A_003_08072010150403 | NDWI < -0.25 OR B3 ≤ 1000 | Manual                  | 1 - - - - 6 - - - -   |
| Landsat 5 TM         | 15-Aug-2010 | LT50030702010227CUB00      | NDWI < -0.45              | TM3/TM5 ≥ 2 & TM1 > 25  | 1 2 - 4 5 6 7 8 9 10  |
| ASTER-L1A (w/o SWIR) | 23-Aug-2010 | AST_L1A_003_08232010150404 | NDWI < -0.25 OR B3 ≤ 1000 | Manual                  | - - - - - 6 - - - -   |
| Landsat 5 TM         | 16-Sep-2010 | LT50030702010259CUB00      | NDWI < -0.50              | TM3/TM5 ≥ 2 & TM1 > 25  | 1 2 3 4 5 6 7 8 9 10  |
| Landsat 5 TM         | 14-May-2011 | LT50030702011134CUB00      | NDWI < -0.50              |                         |                       |
| Landsat 5 TM         | 15-Jun-2011 | LT50030702011166CUB00      | NDWI < -0.55              |                         |                       |
| Landsat 5 TM         | 17-Jul-2011 | LT50030702011198CUB00      | NDWI < -0.50              |                         |                       |
| ASTER-L1A (w/o SWIR) | 25-Jul-2011 | AST_L1A_003_07252011150406 | NDWI < -0.25 OR B3 ≤ 1000 |                         |                       |
| ASTER-L1A (w/o SWIR) | 10-Aug-2011 | AST_L1A_003_08102011150405 | NDWI < -0.25 OR B3 ≤ 1000 |                         |                       |
| Landsat 5 TM         | 18-Aug-2011 | LT50030702011230CUB00      | NDWI < -0.50              |                         |                       |
| ASTER-L1A (w/o SWIR) | 2-Sep-2011  | AST_L1A_003_09022011151005 | NDWI < -0.20 OR B3 ≤ 1000 |                         |                       |
| Landsat 5 TM         | 3-Sep-2011  | LT50030702011246CUB00      | NDWI < -0.50              |                         |                       |
| Landsat 5 TM         | 21-Oct-2011 | LT50030702011294CUB00      | NDWI < -0.50              |                         |                       |
| Landsat 5 TM         | 6-Nov-2011  | LT50030702011310CUB00      | NDWI < -0.50              |                         |                       |
| ASTER-L1A (w/o SWIR) | 2-Jul-2012  | AST_L1A_003_07022012151021 | NDWI < -0.25 OR B3 ≤ 1000 |                         |                       |
| ASTER-L1A (w/o SWIR) | 18-Jul-2012 | AST_L1A_003_07182012151012 | NDWI < -0.25 OR B3 ≤ 1000 |                         |                       |
| ASTER-L1A (w/o SWIR) | 18-Jul-2012 | AST_L1A_003_07182012151021 | NDWI < -0.25 OR B3 ≤ 1000 |                         |                       |
| ASTER-L1A (w/o SWIR) | 18-Jul-2012 | AST_L1A_003_07182012151030 | NDWI < -0.25 OR B3 ≤ 1000 |                         |                       |
| ASTER-L1A (w/o SWIR) | 12-Aug-2012 | AST_L1A_003_08122012150400 | NDWI < -0.25 OR B3 ≤ 1000 |                         |                       |

1

2

3

4

5



| Glacier ID     | 1975 - 2010   |                                                             |                                       | 1988 - 2010   |                                                             |                                       | 1988 - 1999   |                                                             |                                       | 2000 - 2010   |                                                             |                                       |
|----------------|---------------|-------------------------------------------------------------|---------------------------------------|---------------|-------------------------------------------------------------|---------------------------------------|---------------|-------------------------------------------------------------|---------------------------------------|---------------|-------------------------------------------------------------|---------------------------------------|
|                | No. of Images | Decline Rate $\pm$ 95 % CI ( $\text{km}^2 \text{yr}^{-1}$ ) | RMSE ( $\text{km}^2 \text{yr}^{-1}$ ) | No. of Images | Decline Rate $\pm$ 95 % CI ( $\text{km}^2 \text{yr}^{-1}$ ) | RMSE ( $\text{km}^2 \text{yr}^{-1}$ ) | No. of Images | Decline Rate $\pm$ 95 % CI ( $\text{km}^2 \text{yr}^{-1}$ ) | RMSE ( $\text{km}^2 \text{yr}^{-1}$ ) | No. of Images | Decline Rate $\pm$ 95 % CI ( $\text{km}^2 \text{yr}^{-1}$ ) | RMSE ( $\text{km}^2 \text{yr}^{-1}$ ) |
| 10 (NM)        | 12            | $0.16 \pm 0.03$                                             | 0.41                                  | 11            | $0.14 \pm 0.06$                                             | 0.40                                  | 5             | $0.34 \pm 0.27$                                             | 0.39                                  | 6             | $0.21 \pm 0.10$                                             | 0.07                                  |
| 7 (NCT)        | 18            | $0.07 \pm 0.01$                                             | 0.12                                  | 17            | $0.07 \pm 0.02$                                             | 0.12                                  | 8             | $0.11 \pm 0.06$                                             | 0.13                                  | 9             | $0.09 \pm 0.05$                                             | 0.08                                  |
| 9 (NCc)        | 18            | $0.08 \pm 0.02$                                             | 0.21                                  | 16            | $0.08 \pm 0.02$                                             | 0.17                                  | 8             | $0.12 \pm 0.08$                                             | 0.20                                  | 8             | $0.10 \pm 0.05$                                             | 0.09                                  |
| 4 (NI)         | 14            | $0.13 \pm 0.02$                                             | 0.29                                  | 13            | $0.10 \pm 0.04$                                             | 0.28                                  | 5             | $0.19 \pm 0.17$                                             | 0.29                                  | 8             | $0.11 \pm 0.11$                                             | 0.24                                  |
| 5 (NP)         |               |                                                             |                                       | 11            | $0.11 \pm 0.03$                                             | 0.20                                  | 5             | $0.18 \pm 0.08$                                             | 0.15                                  | 6             | $0.15 \pm 0.21$                                             | 0.18                                  |
| 6 (NS)         | 19            | $0.31 \pm 0.02$                                             | 0.46                                  | 17            | $0.29 \pm 0.04$                                             | 0.40                                  | 9             | $0.27 \pm 0.14$                                             | 0.52                                  | 8             | $0.38 \pm 0.06$                                             | 0.16                                  |
| 8 (NAC)        | 13            | $0.45 \pm 0.07$                                             | 1.86                                  | 12            | $0.46 \pm 0.14$                                             | 1.94                                  | 6             | $0.51 \pm 0.76$                                             | 2.93                                  | 6             | $0.40 \pm 0.43$                                             | 0.85                                  |
| 3 (NA)         | 11            | $0.32 \pm 0.08$                                             | 1.51                                  | 10            | $0.32 \pm 0.14$                                             | 1.60                                  | 4             | $0.61 \pm 0.89$                                             | 1.71                                  | 6             | $0.66 \pm 0.46$                                             | 0.95                                  |
| 1 (QIC)        | 14            | $0.57 \pm 0.09^*$                                           | 1.44                                  | 13            | $0.56 \pm 0.11$                                             | 1.49                                  | 5             | $0.73 \pm 0.17$                                             | 0.60                                  | 8             | $0.96 \pm 0.32$                                             | 1.03                                  |
| 2 (MGRCV)      | 13            | $2.87 \pm 0.42$                                             | 21.67                                 | 12            | $2.71 \pm 0.70$                                             | 22.24                                 | 6             | $3.06 \pm 4.21$                                             | 32.45                                 | 6             | $4.27 \pm 1.96$                                             | 8.56                                  |
| CV (1-7, 9-10) |               |                                                             |                                       | 8             | $3.99 \pm 1.15$                                             | 35.94                                 | 3             | $5.66 \pm 24.90$                                            | 52.74                                 | 5             | $6.55 \pm 4.76$                                             | 20.11                                 |

\* 1980 (not 1975) - 2010 for QIC

**Table S2:** Glacial decline rates (not normalized) using minimum areas for each year for each glacierized ID throughout the Cordillera Vilcanota (IDs 1-7, 9-10) and just beyond (ID 8) for four different time periods: 1975-2010 (the whole time series, including Corona and MSS imagery), 1988-2010 (the densest time series, Landsat TM/ETM+ and ASTER), 1988-1999 (which roughly represents the 1990s but with additional 1988 data points to strengthen the regression), and 2000-2010 (the 2000s). This table is the pre-normalized version of Table 3, with the addition of an RMSE column.

# Hanshaw and Bookhagen: Supplementary Material

| Lake ID | Name (if known)       | Easting | Northing | Earliest TM Area (km <sup>2</sup> ) | Earliest TM Area Date | Latest TM Area (km <sup>2</sup> ) | Latest TM Area Date | Area Change (%)            | Summary of Change  |
|---------|-----------------------|---------|----------|-------------------------------------|-----------------------|-----------------------------------|---------------------|----------------------------|--------------------|
| 2       | Laguna Sibinacocha    | 281807  | 8465689  | 25.193                              | 07/25/85              | 28.202                            | 10/21/11            | 11.9                       | Not Natural        |
| 5       |                       | 290564  | 8452268  | 0.730                               | 07/25/85              | 0.724                             | 11/06/11            | -0.8                       | Stable             |
| 6       | Laguna Huarurumicocha | 272311  | 8480662  | 0.063                               | 05/06/85              | 0.062                             | 10/21/11            | -2.5                       | Stable             |
| 7       |                       | 271493  | 8481826  | 0.341                               | 07/25/85              | 0.383                             | 10/21/11            | 12.3                       | Moderate Growth    |
| 39      |                       | 268881  | 8484817  | 0.036                               | 05/06/85              | 0.032                             | 10/21/11            | -10.1                      | Moderate Decline   |
| 31      |                       | 268004  | 8485559  | 0.219                               | 05/06/85              | 0.209                             | 10/21/11            | -4.6                       | Stable             |
| 32      | Laguna Singrenacocha  | 266203  | 8488682  | 2.849                               | 05/06/85              | 2.808                             | 10/21/11            | -1.5                       | Stable             |
| 8       |                       | 255485  | 8476568  | 0.009                               | 05/06/85              | 0.194                             | 10/21/11            | 2107.7                     | Significant Growth |
| 46      | Laguna Pucacocha      | 256711  | 8471542  | 0.213                               | 05/04/90              | 0.209                             | 11/06/11            | -1.9                       | Stable             |
| 9       |                       | 253688  | 8472565  | 0.098                               | 05/06/85              | 0.090                             | 11/06/11            | -7.4                       | Minimal Decline    |
| 20      |                       | 348622  | 8459476  | 0.097                               | 08/02/88              | 0.093                             | 11/06/11            | -4.4                       | Stable             |
| 21      |                       | 348598  | 8455665  | 0.221                               | 07/25/85              | 0.229                             | 11/06/11            | 4.0                        | Stable             |
| 50      |                       | 345177  | 8452149  | 0.233                               | 05/06/85              | 0.309                             | 11/06/11            | 32.4                       | Moderate Growth    |
| 22      |                       | 305368  | 8442352  | 0.011                               | 08/18/88              | 0.010                             | 09/03/11            | -10.0                      | Moderate Decline   |
| 23      |                       | 298261  | 8455219  | 0.013                               | 07/06/07              | 0.017                             | 11/06/11            | 29.8                       | Moderate Growth    |
| 24      |                       | 300804  | 8461043  | 0.015                               | 05/04/90              | 0.009                             | 08/15/10            | -39.7                      | Moderate Decline   |
| 25      |                       | 300517  | 8460427  | 0.011                               | 08/14/98              | 0.061                             | 11/06/11            | 472.3                      | Significant Growth |
| 26      |                       | 299617  | 8459054  | 0.014                               | 08/02/88              | 0.032                             | 11/06/11            | 125.0                      | Significant Growth |
| 30      | Laguna Armaccocha     | 263310  | 8485068  | 0.606                               | 05/06/85              | 0.561                             | 09/03/11            | -7.4                       | Minimal Decline    |
| 34      |                       | 301702  | 8461358  | 0.027                               | 08/02/88              | 0.025                             | 11/06/11            | -6.7                       | Minimal Decline    |
| 33      |                       | 300980  | 8461956  | 0.008                               | 07/25/85              | 0.316                             | 09/03/11            | 3745.2                     | Significant Growth |
| 35      |                       | 299034  | 8458600  | 0.012                               | 10/27/96              | 0.077                             | 11/06/11            | 555.8                      | Significant Growth |
| 36      |                       | 280549  | 8476358  | 0.142                               | 05/04/90              | 0.128                             | 10/21/11            | -9.5                       | Minimal Decline    |
| 37      |                       | 281884  | 8475474  | 0.523                               | 07/25/85              | 0.517                             | 10/21/11            | -1.2                       | Stable             |
| 38      | Laguna Amayuni        | 284433  | 8471893  | 2.109                               | 05/06/85              | 2.124                             | 11/06/11            | 0.7                        | Stable             |
| 40      |                       | 277876  | 8482943  | 0.317                               | 05/06/85              | 0.337                             | 08/18/11            | 6.1                        | Minimal Growth     |
| 41      |                       | 274034  | 8486443  | 0.077                               | 05/06/85              | 0.129                             | 09/03/11            | 66.8                       | Moderate Growth    |
| 42      |                       | 301008  | 8463877  | 0.011                               | 07/25/85              | 0.012                             | 11/06/11            | 8.3                        | Minimal Growth     |
| 44      |                       | 356155  | 8454809  | 2.312                               | 08/02/88              | 2.282                             | 11/06/11            | -1.3                       | Stable             |
| 45      |                       | 301197  | 8477901  | 0.015                               | 05/06/85              | 0.027                             | 09/03/11            | 87.7                       | Moderate Growth    |
| 48      | Laguna Quilca         | 281816  | 8409695  | 0.241                               | 08/02/88              | 0.246                             | 11/06/11            | 2.0                        | Stable             |
|         |                       |         |          | Mean: 1.186<br>Median: 0.098        |                       | Mean: 1.305<br>Median: 0.194      |                     | Mean: 230.9<br>Median: 0.7 |                    |
| 49      |                       | 282171  | 8388617  | 0.344                               | 08/18/88              | 0.331                             | 11/06/11            | -3.9                       | Stable             |
| 1       | Laguna Langui         | 260881  | 8397984  | 54.549                              | 08/02/88              | 54.220                            | 11/06/11            | -0.6                       | Stable             |
| 3       | Laguna Cochachaca     | 275785  | 8455448  | 1.509                               | 07/25/85              | 1.484                             | 11/06/11            | -1.7                       | Stable             |
| 4       | Laguna Cocha Uma      | 276792  | 8454254  | 1.464                               | 07/25/85              | 1.437                             | 11/06/11            | -1.8                       | Stable             |
| 10      | Laguna Conococotta    | 261248  | 8414392  | 0.871                               | 07/25/85              | 0.827                             | 11/06/11            | -5.1                       | Minimal Decline    |
| 11      | Laguna Jancococotta   | 340198  | 8377507  | 3.154                               | 07/25/85              | 1.828                             | 09/03/11            | -42.0                      | Moderate Decline   |
| 12      |                       | 352198  | 8376508  | 0.844                               | 07/25/85              | 0.835                             | 11/06/11            | -1.0                       | Stable             |
| 13      |                       | 381829  | 8426559  | 1.238                               | 07/25/85              | 1.130                             | 11/06/11            | -8.7                       | Minimal Decline    |
| 14      |                       | 372188  | 8441884  | 0.252                               | 07/25/85              | 0.237                             | 11/06/11            | -5.9                       | Minimal Decline    |
| 15      |                       | 369908  | 8443332  | 0.302                               | 07/25/85              | 0.276                             | 11/06/11            | -8.5                       | Minimal Decline    |
| 16      |                       | 359676  | 8443875  | 0.987                               | 07/25/85              | 0.916                             | 11/06/11            | -7.2                       | Minimal Decline    |
| 17      |                       | 359572  | 8447310  | 0.604                               | 07/25/85              | 0.579                             | 09/03/11            | -4.1                       | Stable             |
| 18      |                       | 358714  | 8448244  | 0.785                               | 07/25/85              | 0.746                             | 11/06/11            | -5.0                       | Minimal Decline    |
| 19      |                       | 358015  | 8456141  | 0.327                               | 07/25/85              | 0.327                             | 11/06/11            | -0.1                       | Stable             |
| 27      | Laguna Sacacanicocha  | 275861  | 8425772  | 2.374                               | 07/25/85              | 2.304                             | 11/06/11            | -2.9                       | Stable             |
| 28      | Laguna Asnacocha      | 232508  | 8439237  | 3.040                               | 05/06/85              | 2.823                             | 11/06/11            | -7.1                       | Minimal Decline    |
| 29      | Laguna Acopia         | 230652  | 8443674  | 0.480                               | 07/25/85              | 0.458                             | 11/06/11            | -4.5                       | Stable             |
| 47      | Laguna Pomacanchi     | 227033  | 8448491  | 20.227                              | 08/02/88              | 20.514                            | 10/21/11            | 1.4                        | Stable             |
| 43      |                       | 357893  | 8451780  | 1.016                               | 07/25/85              | 0.974                             | 11/06/11            | -4.1                       | Stable             |
|         |                       |         |          | Mean: 4.967<br>Median: 0.983        |                       | Mean: 4.855<br>Median: 0.916      |                     | Mean: -5.9<br>Median: -4.1 |                    |

**Table S3:** Data from which Figure 16 in the main manuscript is derived. If one lake is the only lake investigated in a watershed, it is enclosed above and below by black lines. If lakes flow into each other, as in, if multiple lakes are within the watershed of the lake farthest downstream, these are those between the black lines, ordered by first lake in the watershed to last lake (for an example, please refer to Lake IDs 6, 7, 39, 31, and 32).

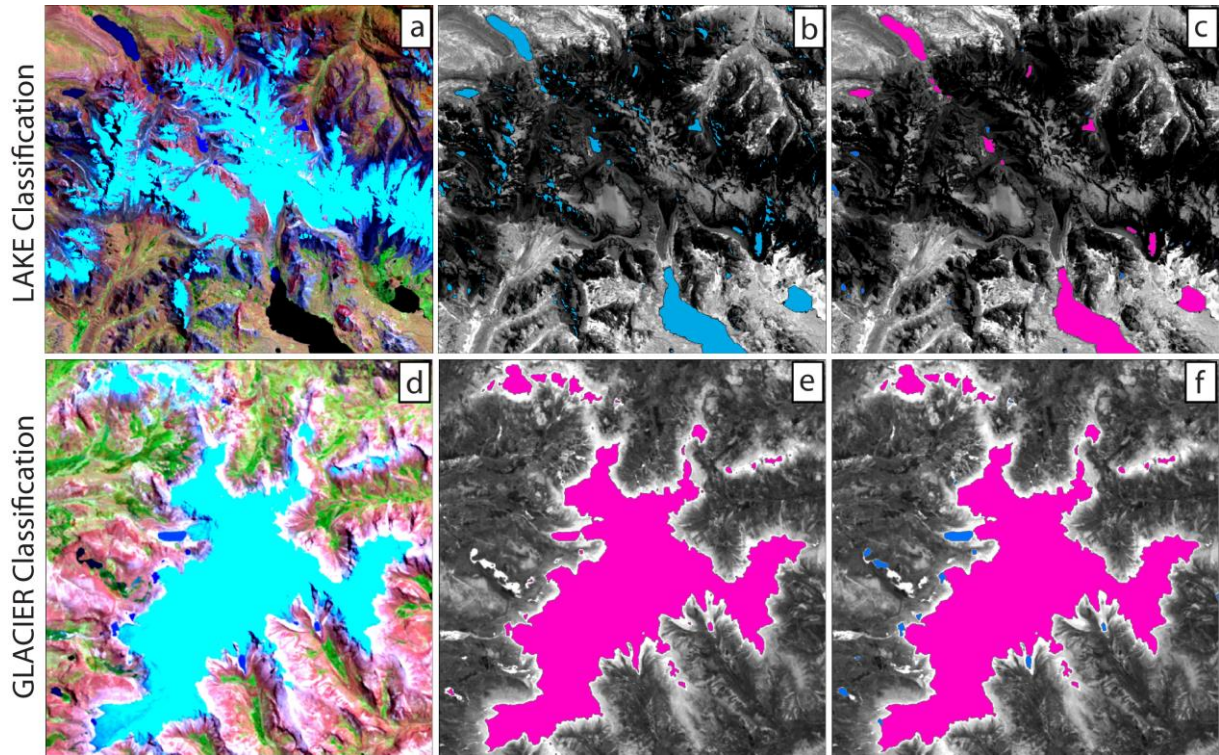

**Figure S1:** Images summarizing classification methods for lake (a, b, c) and glacier (d, e, f) outlines – (a) and (d) Landsat TM image for 09/16/2010 (Bands 742 RGB), (b) NDWI with threshold and 5x5 closing filter applied (resulting "lakes" colored blue). Note that many shadow areas are incorrectly classified as lakes. (c) Final lake mask, post-hillshade shadow removal and manual editing. Lakes colored in pink indicate some of the 50 lakes that were selected and identified to be followed through time. (e) TM3/TM5 with thresholds applied (resulting "glaciers" colored pink). Note that some lakes are incorrectly classified as glaciers. (f) Final glacier mask (for the Quelccaya Ice Cap), post-lake removal (lakes from lake mask are colored in blue) and manual editing.

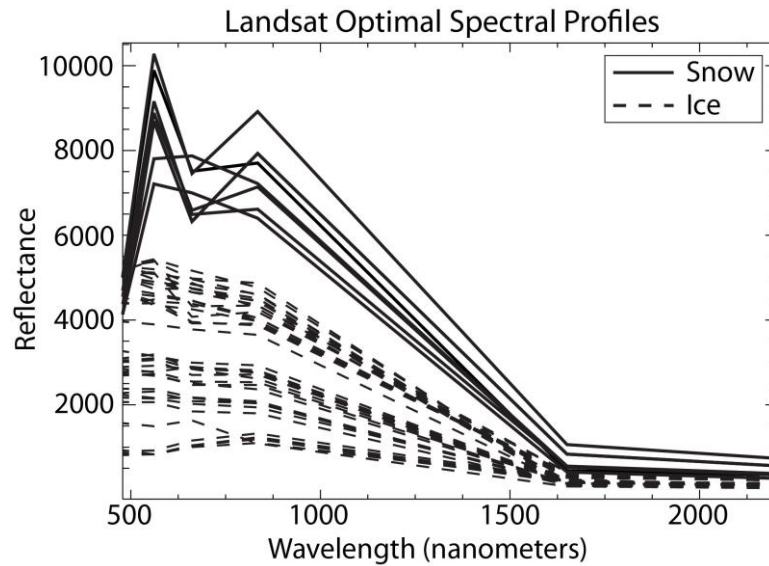

**Figure S2:** Optimal spectra used in MESMA analysis for Landsat imagery (3 images ranging from 09/03/1988-10/15/2009). Solid lines indicate snow spectra, and dashed lines indicate ice spectra. Note that there is a general greater variability within the ice spectra than in the snow spectra and we have thus relied on more endmembers for ice.

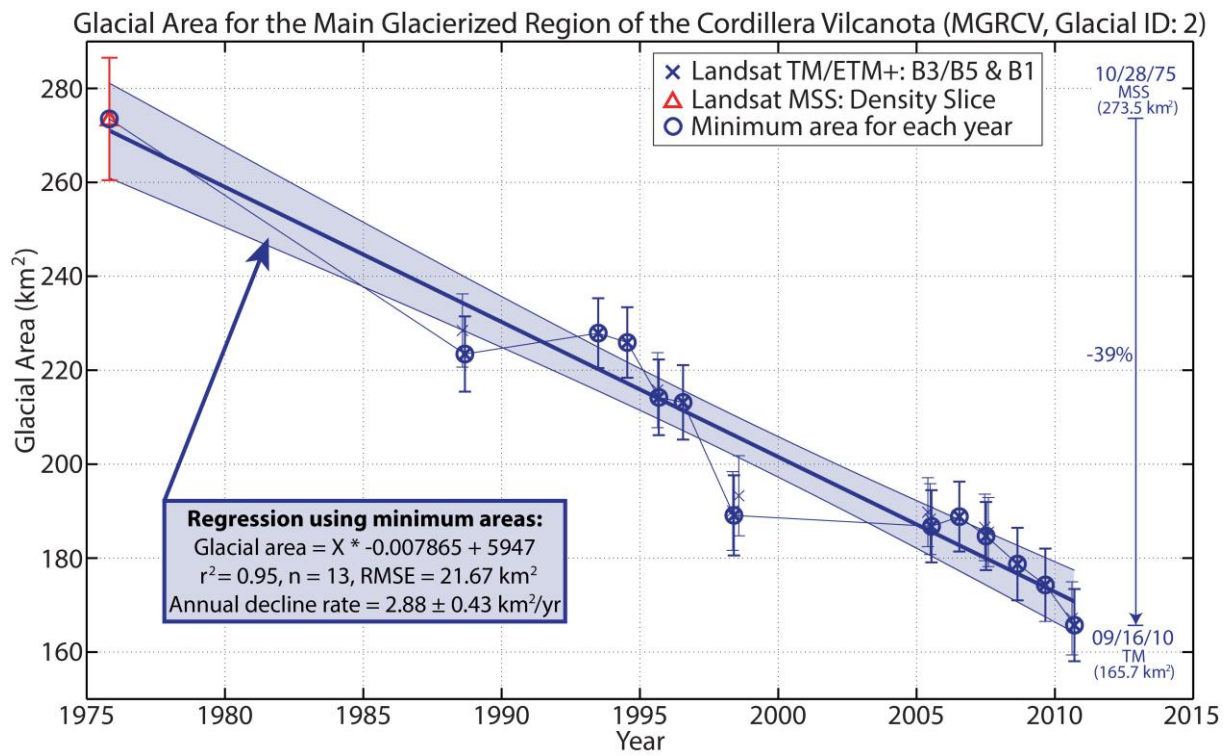

**Figure S3:** Glacial-area time series for the main glacierized region of the CV (Glacial ID: 2, Figure 8).

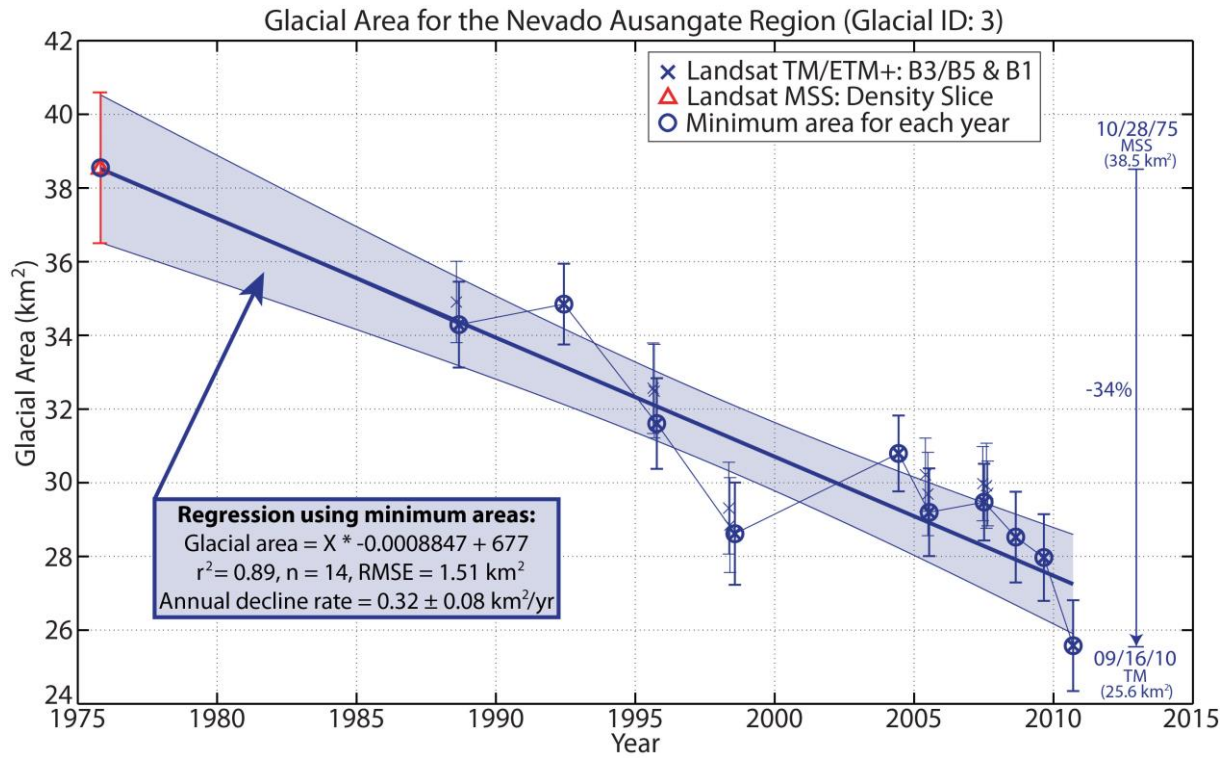

**Figure S4:** Glacial-area time series for the Nevado Ausangate region (Glacial ID: 3, Figure 8).



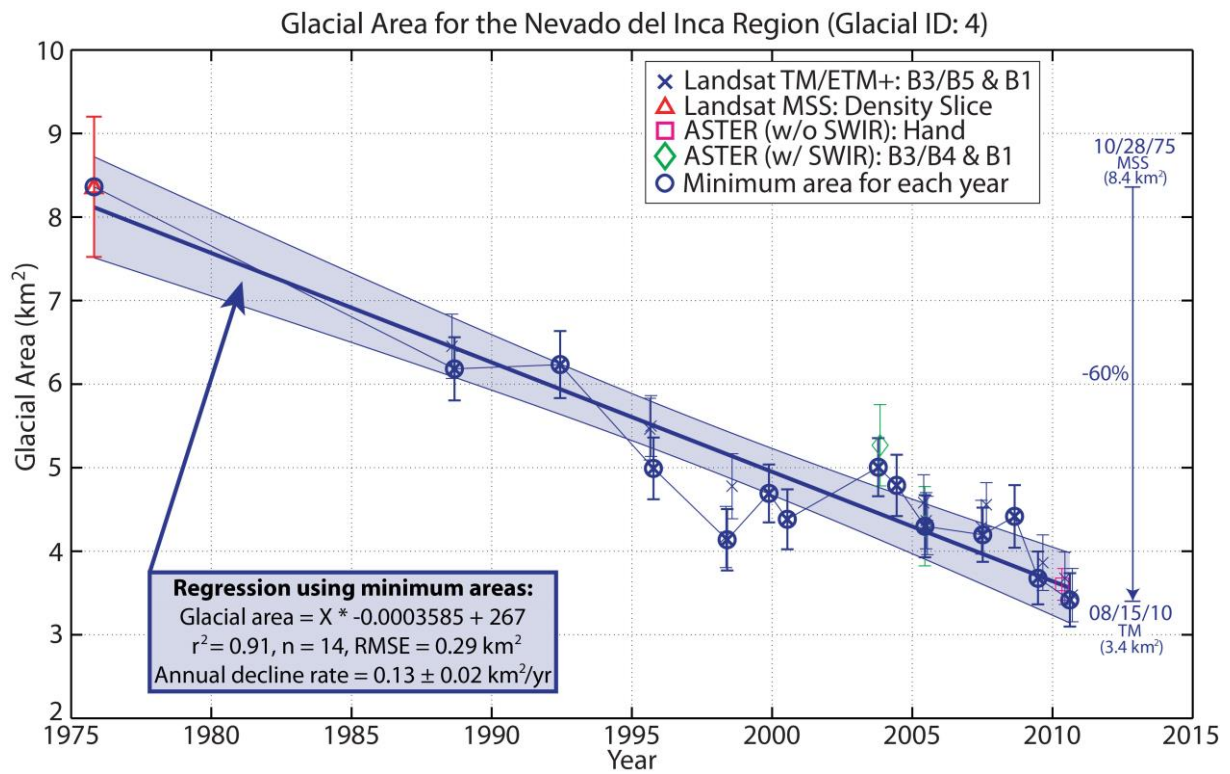

**Figure S5:** Glacial-area time series for the Nevado del Inca region (Glacial ID: 4, Figure 8).

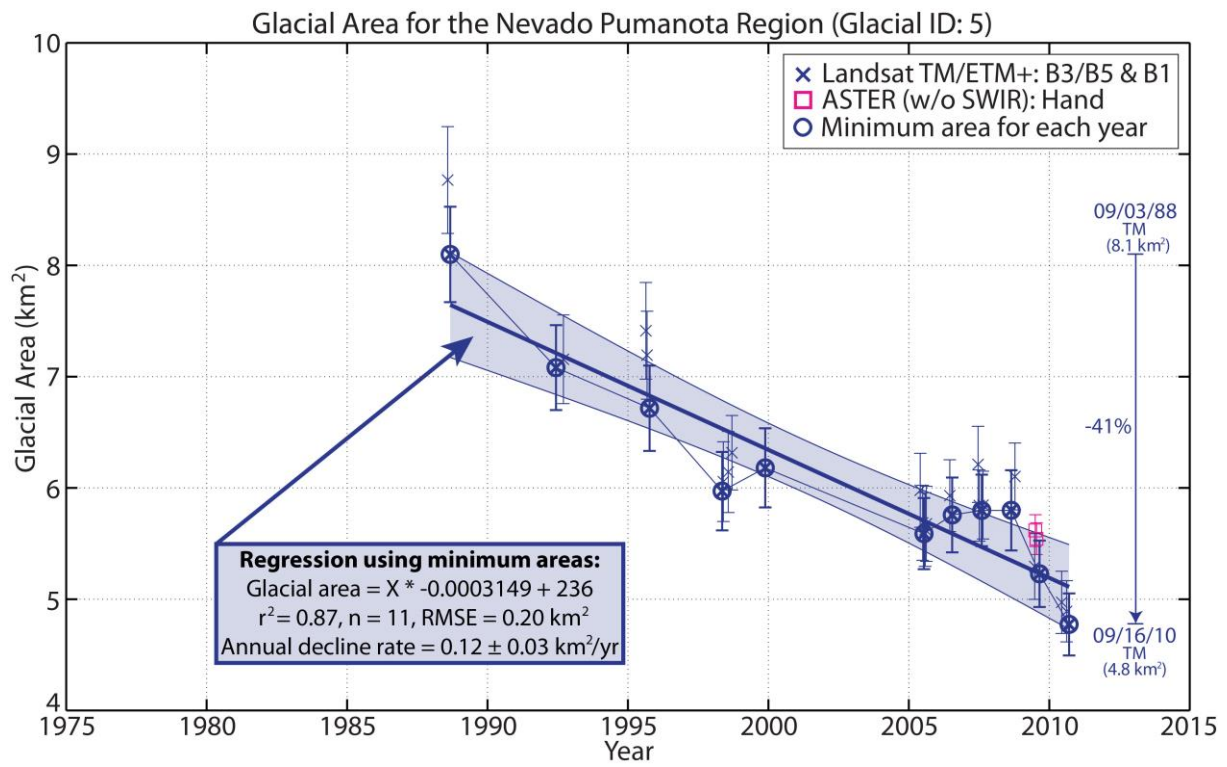

**Figure S6:** Glacial-area time series for the Nevado Pumanota region (Glacial ID: 5, Figure 8).



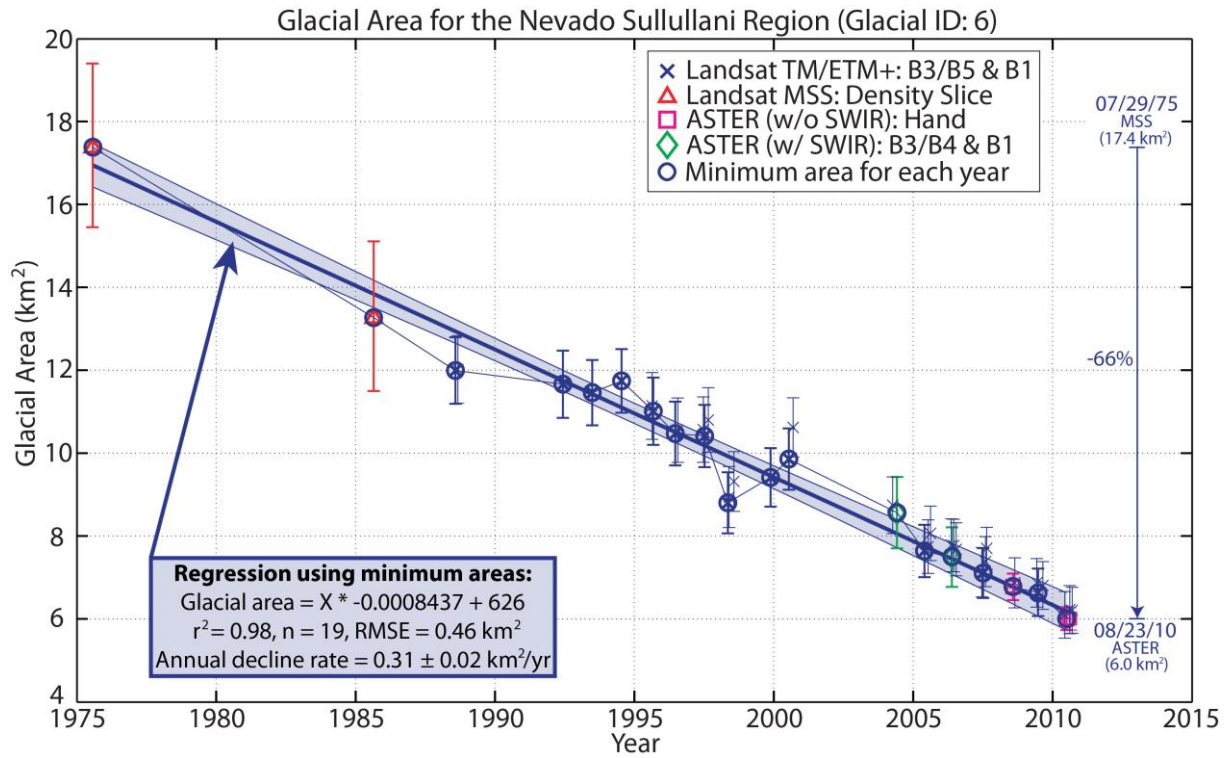

**Figure S7:** Glacial-area time series for the Nevado Sullullani region (Glacial ID: 6, Figure 8).

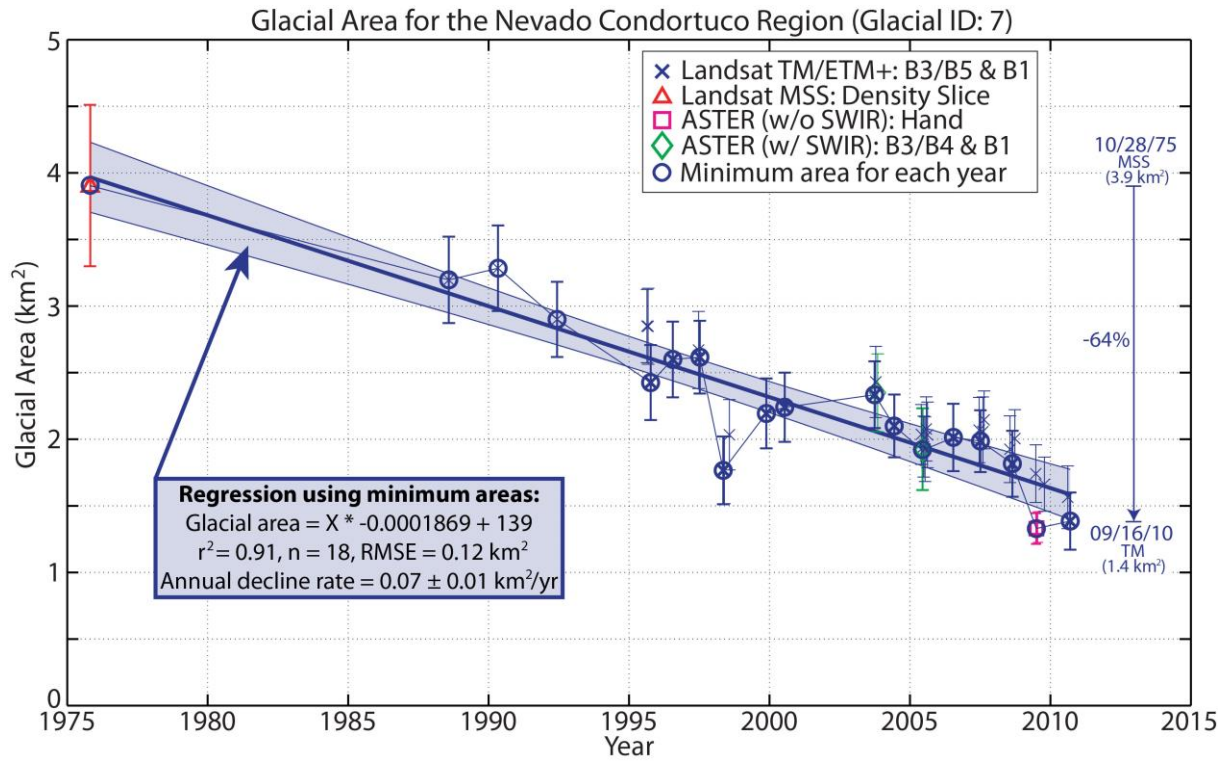

**Figure S8:** Glacial-area time series for the Nevado Condortuco region (Glacial ID: 7, Figure 8).

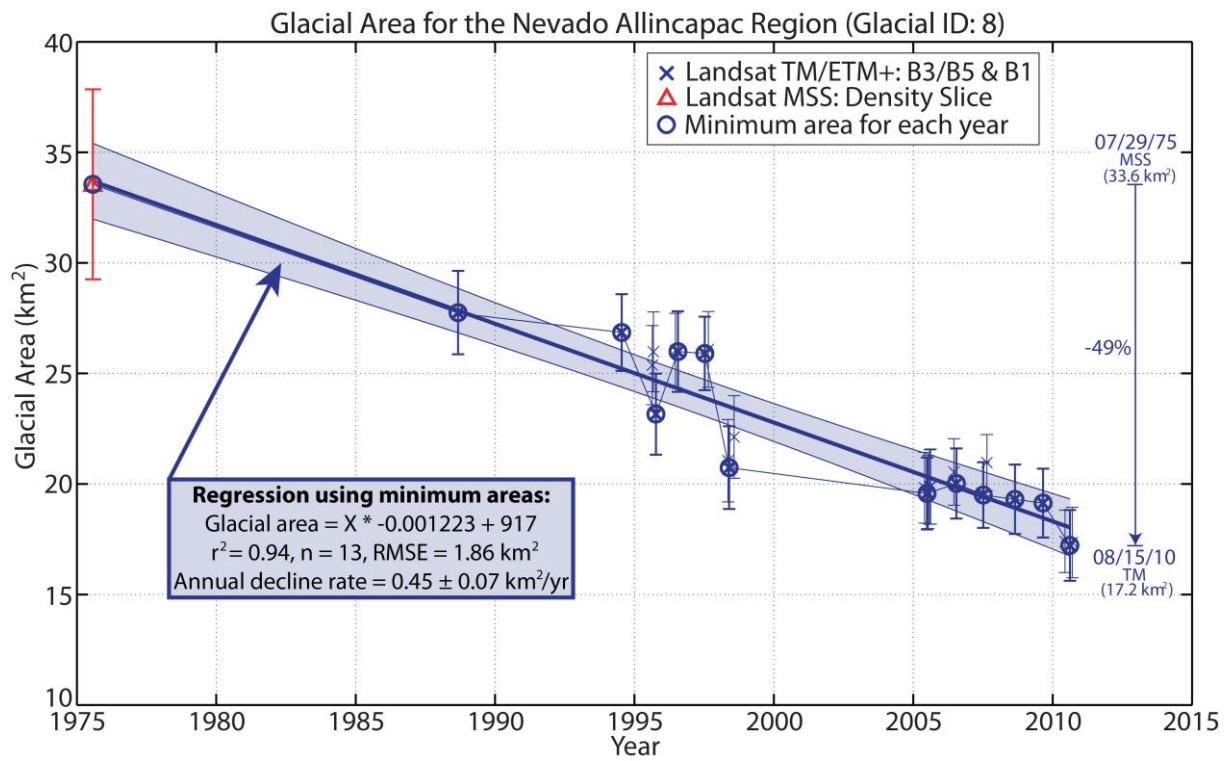

**Figure S9:** Glacial-area time series for the Nevado Allinapac region (Glacial ID: 8, Figure 8). This glacierized region is located just beyond the eastern boundary of the Cordillera Vilcanota.

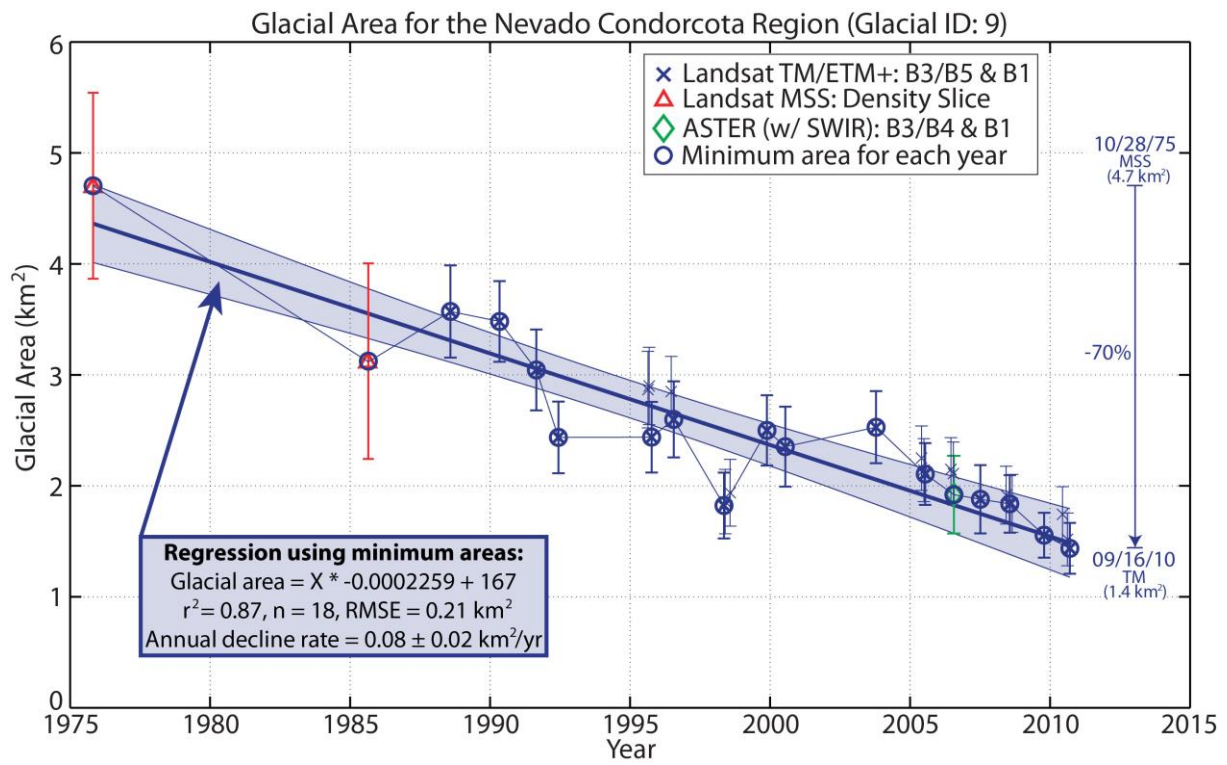

**Figure S10:** Glacial-area time series for the Nevado Condorcota region (Glacial ID: 9, Figure 8).

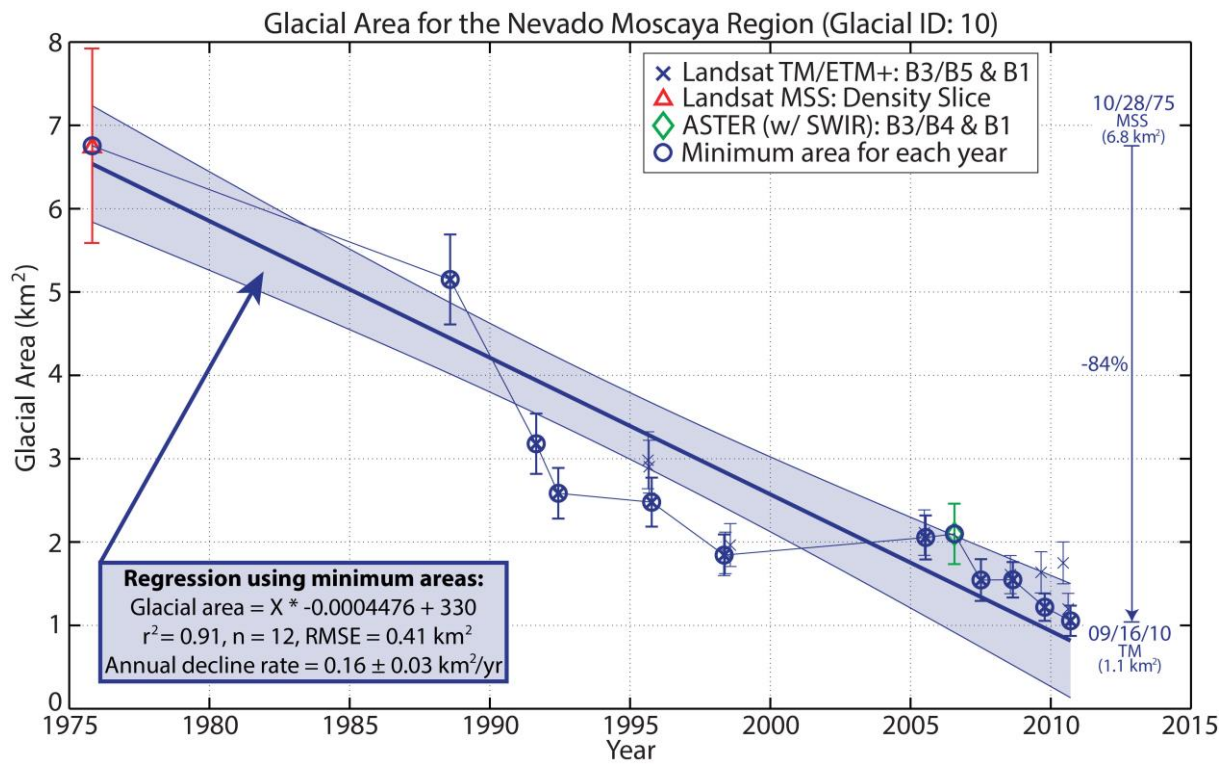

**Figure S11:** Glacial-area time series for the Nevado Moscaya region (Glacial ID: 10, Figure 8).

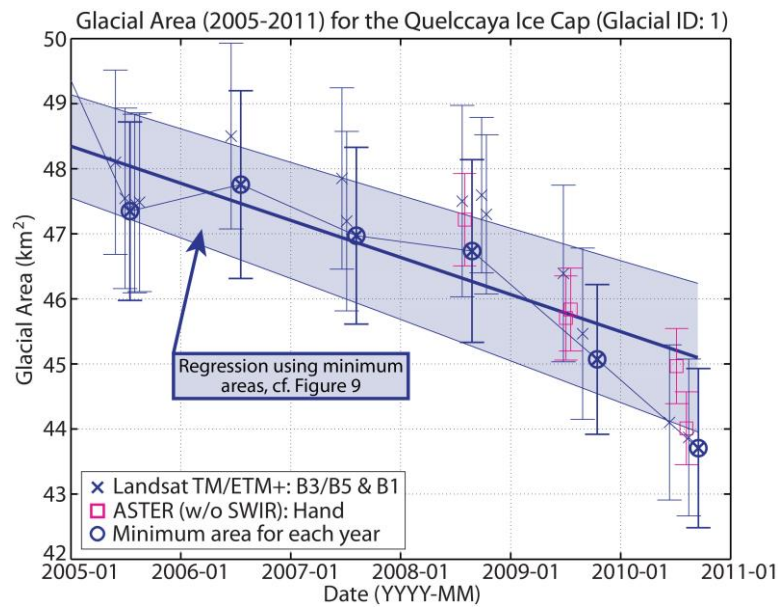

**Figure S12:** Focus on 2005-2011 of the glacial-area time series for the Quelccaya Ice Cap (the whole time series is shown in Figure 9). Notice the intra-annual variability, which exists even when using the same classifier, same methodology, and only classifying images that visually appear snow free. Within years, and between years, however, these measurements do overlap within their  $1\sigma$  error bars.

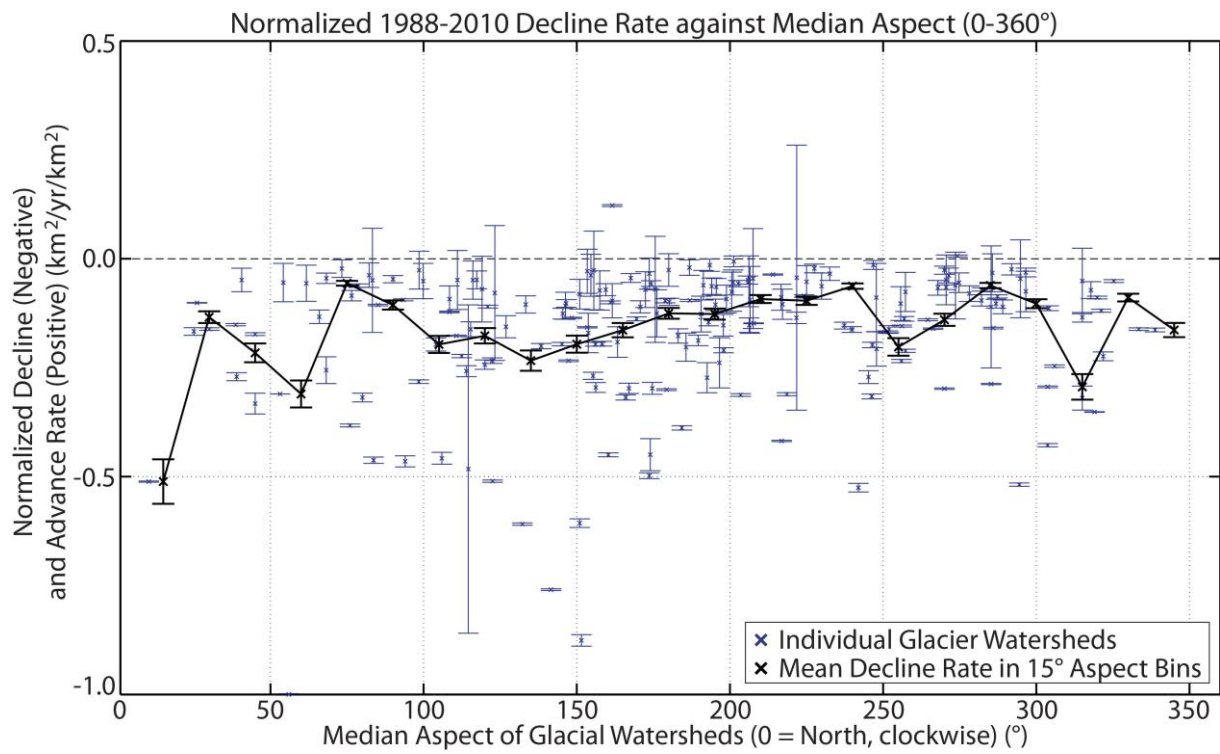

**Figure S13:** Normalized (against median area) decline rates against median aspect of glaciers within individual glacial watersheds. Error bars indicate 95 % CI.



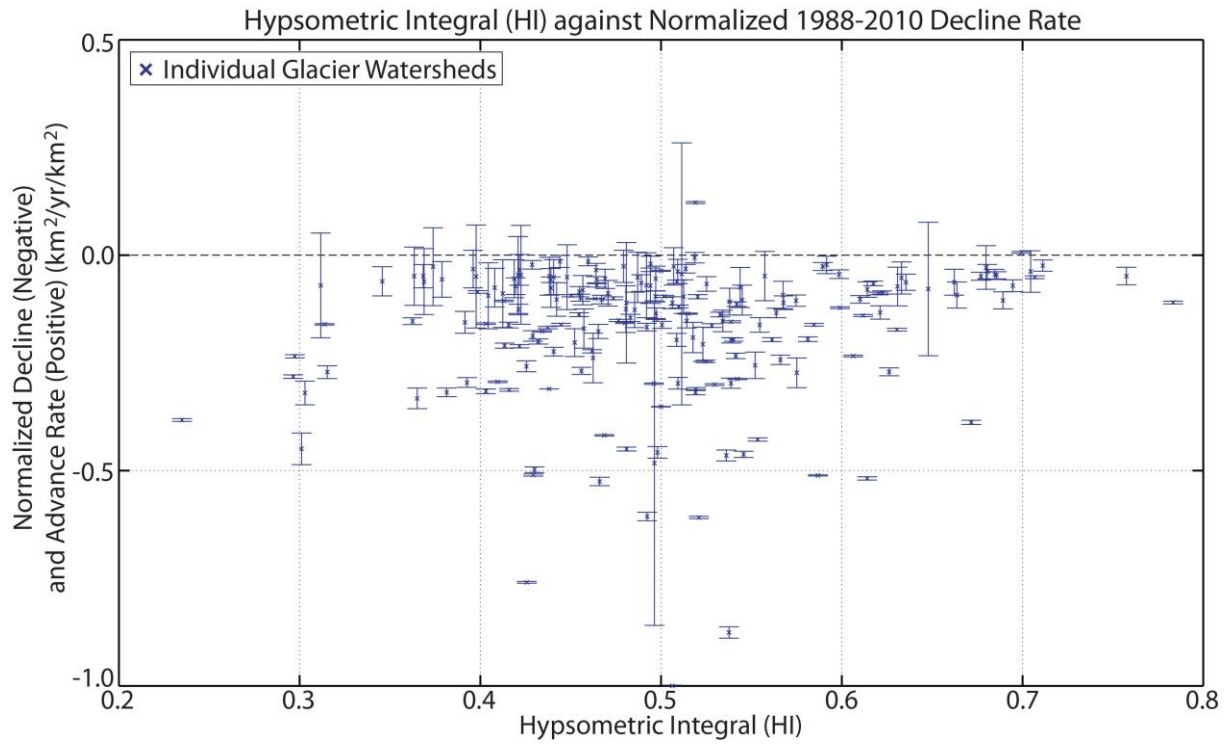

**Figure S14:** Normalized (against median area) decline rates against the hypsometric integral (HI) within individual glacial watersheds. Error bars indicate 95 % CI. The hypsometric integral (HI) shows the shape of the basin: HI values < 0.5 indicate more area at lower elevations, whereas a HI > 0.5 indicate more area at higher elevations.



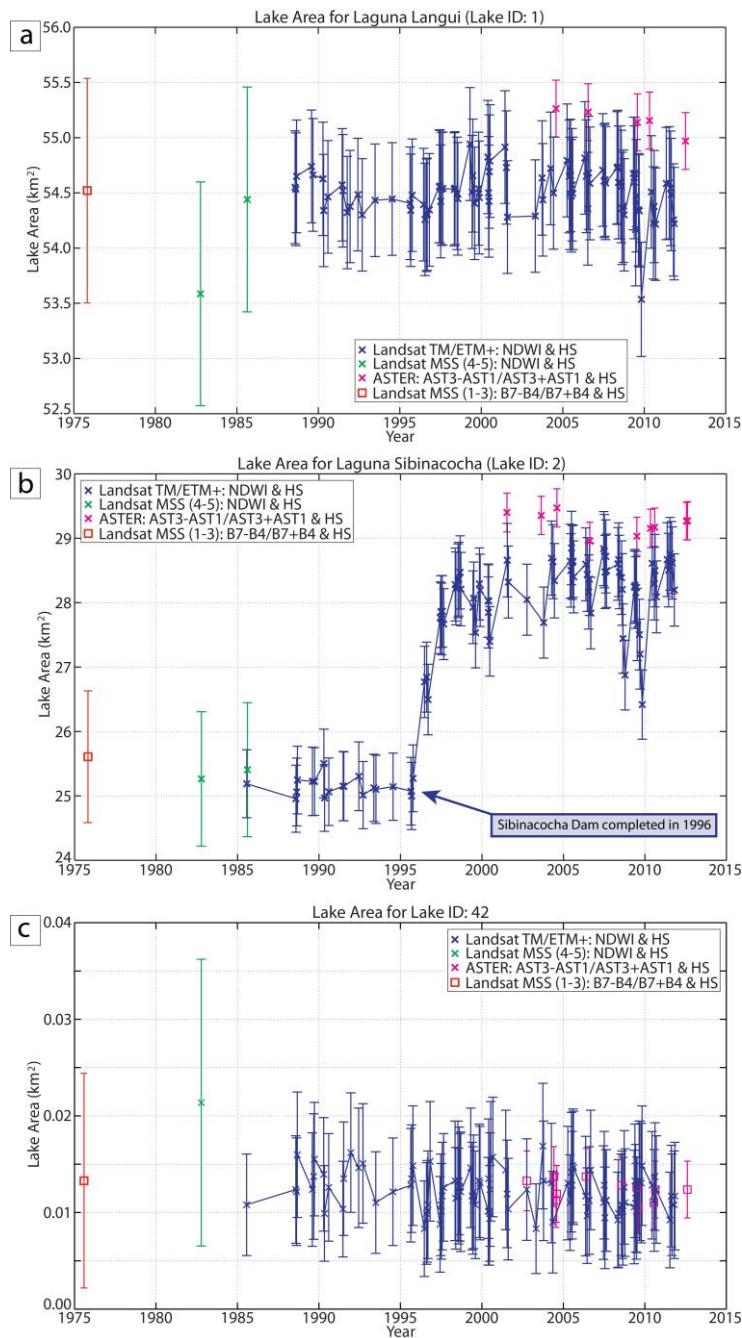

**Figure S15:** Graphical results for three lakes to illustrate lake area changes beyond uncertainties: a) Laguna Langui (Lake ID: 1, Figure 8) – the largest lake in this region, represents a large lake which does not change beyond its uncertainties, b) Laguna Sibinacocha (Lake ID: 2, Figure 8) is a managed lake which we have removed from our analyses, but here we use it to represent a large lake which does change beyond its uncertainties, and c) Lake ID: 42 (unnamed, Figure 8) represents a small lake which does not change beyond its uncertainties. Examples of small lakes which do change beyond their uncertainties are provided in the main manuscript.

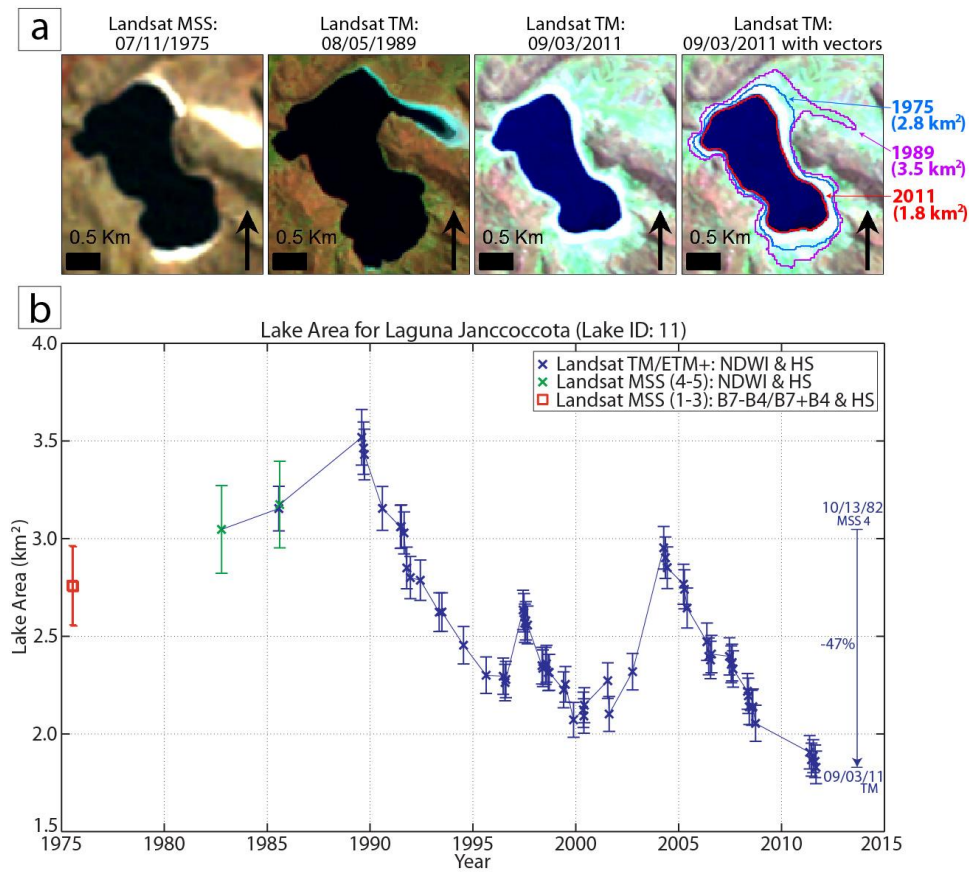

**Figure S16:** Visual (a) and graphical (b) results for the area of Laguna Jancococota (Lake ID: 11, Figure 8) - a small and mostly declining lake not connected to a glacial watershed.

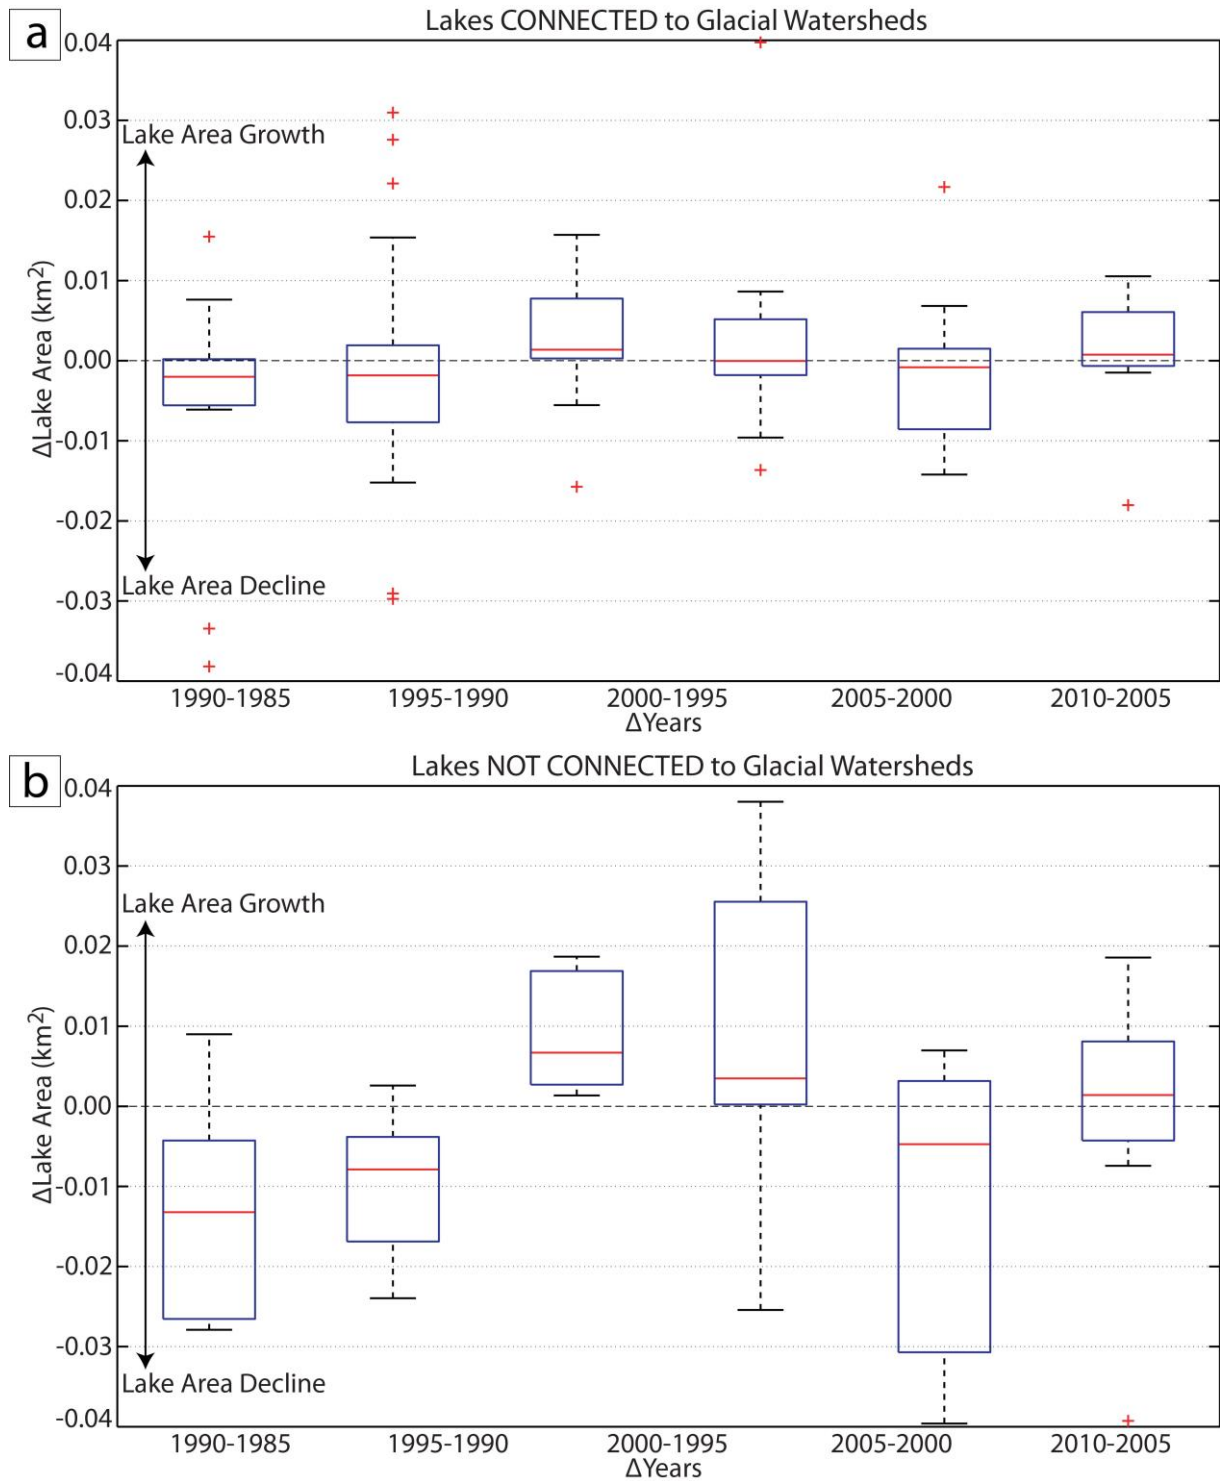

**Figure S17:** Lake-area changes within 5-year time intervals for a) lakes connected to glacial watersheds, and b) lakes not connected to glacial watersheds. We have calculated lake-area changes by subtracting last lake areas from first lake areas within a time interval.

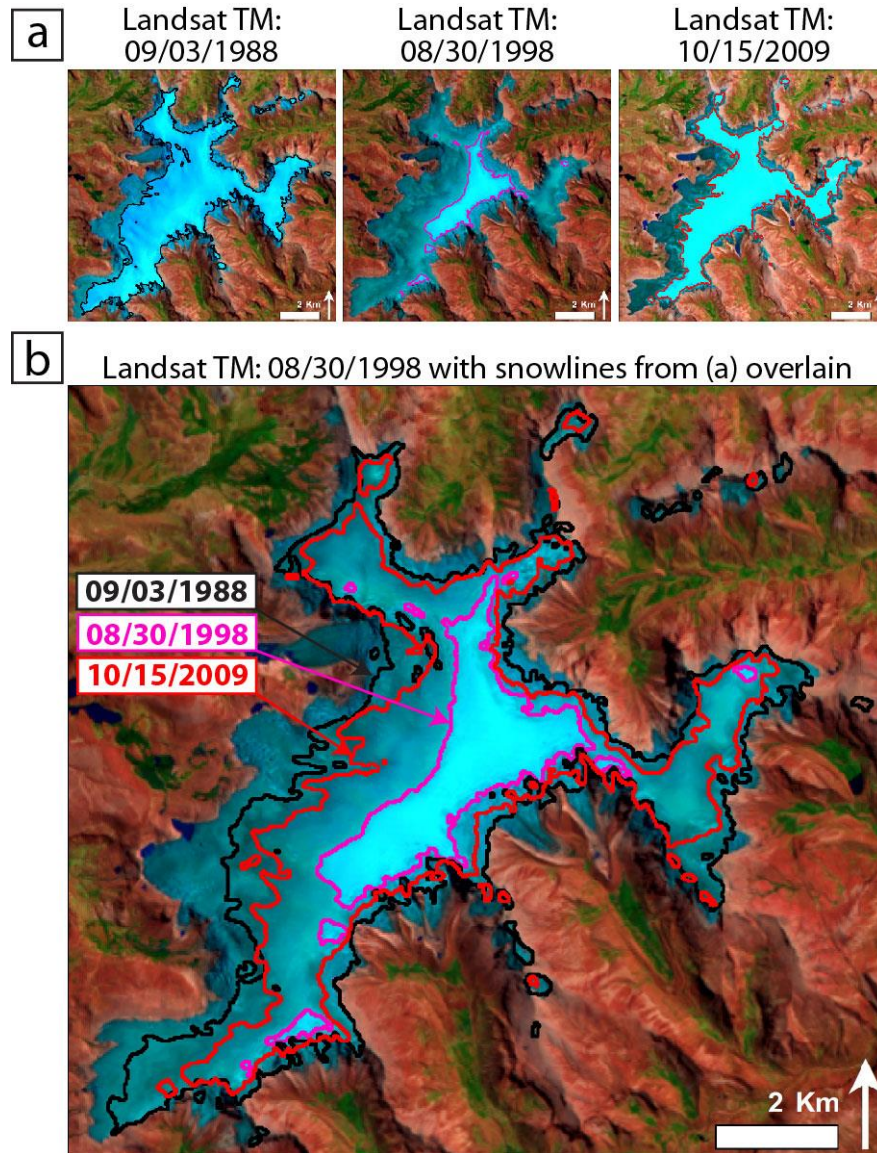

**Figure S18:** a) Visual snowlines for the Quelccaya Ice Cap for 1988, 1998, and 2009, and their classifications using Multiple Endmember Spectral Mixture Analysis (MESMA). In part b) we have overlain the snowlines from a) on the 08/30/1998 image to show relative changes.
